# Human immunocompetent Choroid-on-Chip: a novel tool for studying ocular effects of biological drugs

*Madalena Cipriano<sup>1</sup>, Katharina Schlünder<sup>2,3</sup>, Christopher Probst<sup>1</sup>, Kirstin Linke<sup>1</sup>, Martin Weiss<sup>3,4</sup>, Mona J. Fischer<sup>1</sup>, Lena Mesh<sup>5</sup>, Kevin Achberger<sup>5</sup>, Stefan Liebau<sup>5</sup>, Marina Mesquida<sup>6</sup>, Valeria Nicolini<sup>6</sup>, Anneliese Schneider<sup>7</sup>, Anna Maria Giusti<sup>7</sup>, Stefan Kustermann<sup>6</sup>, Peter Loskill<sup>2,3\*</sup>*

<sup>1</sup> Fraunhofer Institute for Interfacial Engineering and Biotechnology IGB, Stuttgart, Germany

<sup>2</sup> Department of Biomedical Science, Eberhard Karls University Tübingen, Tübingen, Germany

<sup>3</sup> NMI Natural and Medical Sciences Institute at the University of Tübingen, Reutlingen, Germany

<sup>4</sup> Department of Women's Health, Research Institute for Women's Health, Eberhard Karls University Tübingen, Tübingen, Germany

<sup>5</sup> Institute of Neuroanatomy & Developmental Biology (INDB), Eberhard Karls University Tübingen, Tübingen, Germany

<sup>6</sup> Pharmaceutical Sciences, Roche Pharma Research and Early Development, Roche Innovation Center Basel, F. Hoffmann-La Roche Ltd., Basel, Switzerland

<sup>7</sup> Pharmaceutical Sciences, Roche Pharma Research and Early Development, Roche Innovation Center Zurich, F. Hoffmann-La Roche Ltd., Basel, Switzerland

\* Corresponding Author

## Abstract:

Disorders of the eye leading to visual impairment are a major issue that affects millions of people. On the other side ocular toxicities were described for e.g. molecularly targeted therapies in oncology and may hamper their development. Current ocular model systems feature a number of limitations affecting human-relevance and availability. To find new options for pharmacological treatment and assess mechanisms of toxicity, hence, novel complex model systems that are human-relevant and readily available are urgently required. Here, we report the development of a human immunocompetent Choroid-on-Chip (CoC), a human cell-based in vitro model of the choroid layer of the eye integrating melanocytes and microvascular endothelial cells, covered by a layer of retinal pigmented epithelial cells. Immunocompetence is achieved by perfusion of peripheral immune cells. We demonstrate controlled immune cell recruitment into the stromal compartments through a vascular monolayer and in vivo-like cytokine release profiles. To investigate applicability for both efficacy testing of immunosuppressive compounds as well as safety profiling of immunoactivating antibodies, we exposed the CoCs to cyclosporine and tested CD3 bispecific antibodies.

## Keywords:

Organ-on-chip; Microphysiological Systems; Choroid; immune cell migration; cytokine release; in vitro three-dimensional (3D) model; posterior uveitis

## Graphical Abstract

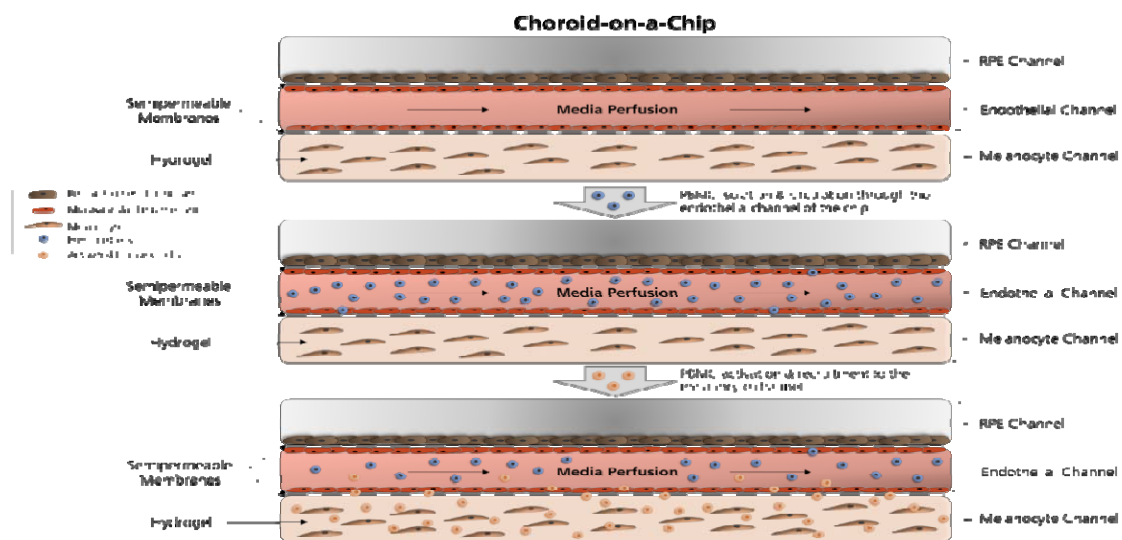

## Introduction

Organ-on-chip (OoC) technology allows building complex in vitro models tailored specifically to the tissue/organ needs. OoC models mimic the microphysiological environment cells experience in a tissue including the vasculature-like perfusion. They are developed to potentiate several functional readouts using very low cell numbers. Over the past years, the technology has emerged as a powerful tool to support drug discovery and development with a potential for pharmaceutical R&D cost reduction<sup>1,2</sup>. The rise of complex treatment modalities, increasing attrition rates and low of predictivity of current model systems created an urgent need for human-relevant and well-characterized in vitro models to support drug development (i) in efficacy testing by building in vitro disease models and (ii) in toxicity testing by providing a unique tool for mechanistic studies. Of particular interest for both efficacy and toxicity testing, is the human eye. Millions of people worldwide are affected by ocular disorders leading to visual impairment<sup>3</sup>. Moreover, ocular toxicities have emerged as an issue of targeted therapies<sup>4</sup> and have been reported for immunotherapies<sup>5</sup>. Hence, to develop ophthalmic drugs and study ocular toxicity, novel human-relevant ocular tissue models are urgently needed<sup>6</sup>.

One such ocular tissue, is the choroid of the eye which belongs to the uveal tract. It is a thin, highly vascularized and pigmented tissue positioned between the neurosensory retina and the sclera, which takes care of the outer retinal demands for nutrition supply and removal of toxic metabolic products. The human choroidal tissue is underlined by the retinal pigmented epithelium (RPE) and its main cell types are melanocytes, choriocapillary microvascular endothelial cells (MVEC), fibrocytes and immune cells<sup>7</sup>. Uveitis refers to a group of ocular disorders characterized by inflammation of the uveal tract, which encompasses the iris, ciliary body and choroid. The inflammatory state is characterized by cytokine release and substantial T cell recruitment and infiltration<sup>8</sup>. Uveitis is the 4<sup>th</sup> leading cause of blindness, responsible for 10% of blindness in the US. Its origin can be infectious (20%) or noninfectious (immune-mediated, drug induced or idiopathic)<sup>9</sup>. Uveitis is categorized based on the primary anatomical location of inflammation. Posterior uveitis involves inflammation of the retina, choroid and sometimes the optic nerve and in spite of not being the most common type of uveitis it is indeed the most sight-threatening kind, with potential for causing severe structural damage and visual impairment<sup>10</sup>. Immunotherapies have been responsible for an increase of drug-

induced uveitis and ocular side effects are observed in up to 70% of patients under immunoncological treatments including inhibitors of VEGFR, EGFR, tumor specific proteins, as well as estrogen receptor modulators, interferons<sup>11</sup> and checkpoint inhibitors<sup>12,13</sup>. All types of checkpoint inhibitors have shown ocular side effects. Ipilimumab, a monoclonal antibody targeting cytotoxic T lymphocyte antigen-4 (CTLA-4) has been associated with choroidal neovascularization that leads to the disruption of the choroid-retina barrier causing significant visual impairment. Uveal effusion was also reported for anti-PD-1/PD-L1 checkpoint inhibitor agents, both small molecules and monoclonal antibodies<sup>14</sup>. Interestingly, uveitis treatment covers immunosuppression with small molecules (*e.g.* corticosteroids, cyclosporine, tacrolimus, or methotrexate) and more recently biologic therapies targeting the inhibition of activated T cells VEGF (*e.g.* adalimumab, infliximab)<sup>8</sup> as well as pro-inflammatory cytokines such as TNF- $\alpha$  and IL-6 (*e.g.* tocilizumab and sarilumab in noninfectious intermediate, posterior, and panuveitis)<sup>15</sup>.

The lack of cross-reactive, pharmacologically relevant animal species poses a challenge in nonclinical safety assessment in the development of novel complex treatment modalities as in cancer immunotherapy. Translation of findings *e.g.* in non-human primates to patients can be hampered due to species differences in their immune systems<sup>16,17</sup>. Two remarkable differences between humans and rhesus and cynomolgus macaques are that CD4+CD8+ double-positive T cells are more abundant in macaques and display unique responses to different type I interferons and that cynomolgus plasmacytoid dendritic cells (pDCs) have a unique pSTAT5 response to IL-6<sup>18</sup>. This is particularly interesting for posterior uveitis since IL-6 is a therapeutic target under phase I/II clinical investigation<sup>15</sup> and pDCs have been reported to be decreased relative to monocyte derived DCs possibly leading to biased CD4<sup>+</sup> T cell immune responses (increased Th1 and decreased Treg cells) in non-infectious uveitis in humans<sup>19</sup>. Hence, advanced human-based and immunocompetent in vitro models of the choroid of the eye are urgently required to study the interplay between the vascular network and the human immune system. Such a model could support research on early detection of drug-induced uveitis and on the discovery of new therapeutic strategies for diseases such as posterior uveitis, regardless of its etiology.

The few available in vitro models of the human eye and especially the choroid are mostly 2D, integrate few cell types and lack vascularization or immune components; aspects that are all crucial for mechanisms of toxicity or disease triggering events<sup>20-22</sup>. In general, in vitro models that study immune cell infiltration are still limited and encompass mostly three-dimensional (3D) skin<sup>23</sup> and tumor models<sup>24-27</sup>.

To address the key physiological characteristics related to choroidal drug reactions and considering immunology, we developed a human immunocompetent choroidal in vitro model that mimics the tissue vascularization, pigmentation and immune response in the presence of circulating immune cells. Here we provide a comprehensive characterization of the novel model and describe how the immunocompetent chip responded i) to immunosuppressive treatment with cyclosporine upon T cell activation and ii) to a T cell bispecific antibody (TCB) containing the T cell receptor binding domain.

## RESULTS and DISCUSSION

### Design, concept and characterization of the Choroid-on-Chip

#### Platform concept

To mimic the tissue complexity of the human choroid, we designed a 3-channel microfluidic platform that allows for the perfusion of circulating immune cells. The Choroid-on-Chip (CoC) comprises three main cellular components (Figure 1A, B and C). The epithelium consists of a monolayer of human induced pluripotent stem cell (iPSC)-derived RPE in the top channel. The endothelium consists of two confluent monolayers of human primary MVECs seeded in the central channel facing on the upper side the RPE and on the lower side the melanocyte compartment. This channel is perfused using a syringe pump at a flow rate of 40  $\mu\text{L/h}$ . The stromal component in the bottom channel features a cell-laden hydrogel incorporating melanocytes at defined cell densities in a 3D arrangement (Figure 1D, orthogonal view). All the epithelial, endothelial and stromal components together form a robust, viable 3D tissue (Figure 1D). The cells are homogenously seeded and distributed in a pigmented tissue throughout the entire length of the chip (Figure 1E). The dimensions of the chip were chosen to match in vivo tissue dimensions: The total height of the 3D tissue on chip is 300  $\mu\text{m}$ ; the human choroidal thickness was estimated to be  $266.8 \pm 78.0 \mu\text{m}$  by Yiu *et al.*<sup>28</sup>.

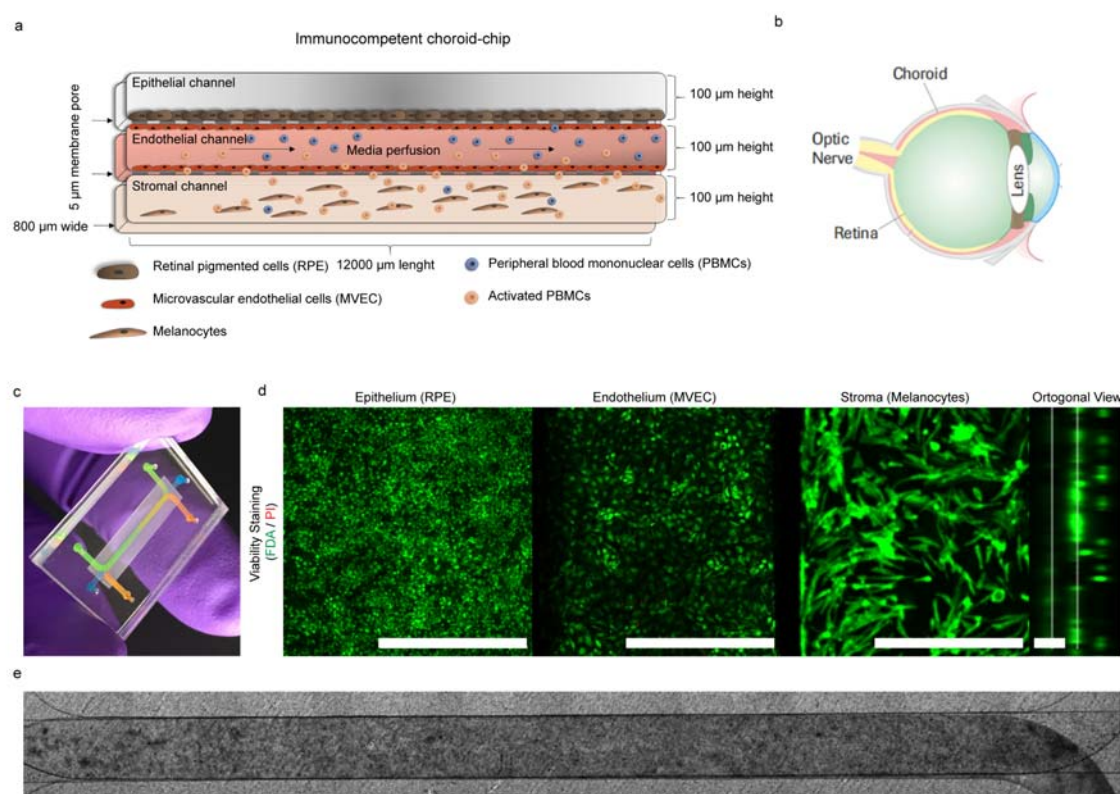

**Figure 1. Concept of the CoC model.** (a) Schematic representation of the different cell types within the chip. (b) Schematic of the layers of the eye. (c) CoC platform filled with watercolor demonstrating the location of the RPE (green), the endothelial (orange) and melanocyte (blue) channels. (d) Live/Dead staining performed with Fluorescein diacetate/Propidium iodide (FDA/PI) to demonstrate the viability of the long-term culture (2 weeks) of the CoC as well an orthogonal view. Scale bar = 500  $\mu\text{m}$  for planar images and 100  $\mu\text{m}$  for the orthogonal view. (e) Bright field image of the whole chip after 2 weeks in culture and 24h of immune cell perfusion.

## Outer blood-retina barrier characterization

To mimic the outer blood-retina barrier (oBRB), RPE and MVECs were cultured on the two sides of the upper membrane, top and bottom respectively (Figure 1A). The RPE formed a pigmented monolayer throughout the entire chip expressing tight junction protein zonula occludens 1 (ZO-1) and tyrosinase-related protein 1 (TYRP1), involved in the generation of melanin<sup>29</sup> (Figure 2A). MVECs formed confluent and CD31 positive monolayers throughout the entire length of the endothelial channel (Figure 2B); endothelial layers were negative for ZO-1 in the CoC. To further assess how our model mimics the oBRB, we evaluated the permeability of the endothelial layer towards the RPE side (oBRB) and towards the stromal side of the tissue (Figure 2C). Our data showed retention of both Carboxyfluorescein (0.377 kDa) and Dextran Texas Red (70 kDa) in the presence of the cell monolayers in all conditions. The retention was higher for the oBRB than for the endothelial-stromal barrier (2-fold) and for the larger molecular weight molecule compared to the lower one.

A comprehensive quantitative analysis of the absolute difference between the permeability of the endothelial-stromal barrier and the oBRB is hampered by the differences in tissue composition of RPE and stromal channel: the hydrogel in the stromal channel leads to a slower intra-channel diffusion in contrast to the medium in the RPE compartment. However, it is worth mentioning that the relative differences are indeed in alignment with the *in vivo* situation and *ex-vivo* data<sup>30</sup> showing a tighter barrier where the RPE is located. The permeability of the choriocapillaris is expected to be 1–2 orders of magnitude higher than the oBRB<sup>31</sup>. The endothelial-RPE barrier is reported to be 30 times less permeable to the 70 kDa dextran than to the carboxyfluorescein<sup>30</sup>. We did not observe the same magnitude of differences in the permeability as described in *ex-vivo* and other *in vitro* studies. However, the chip was not specifically designed to quantify barrier properties but to study effects of drugs and/or immune response in the stromal and epithelial compartments.

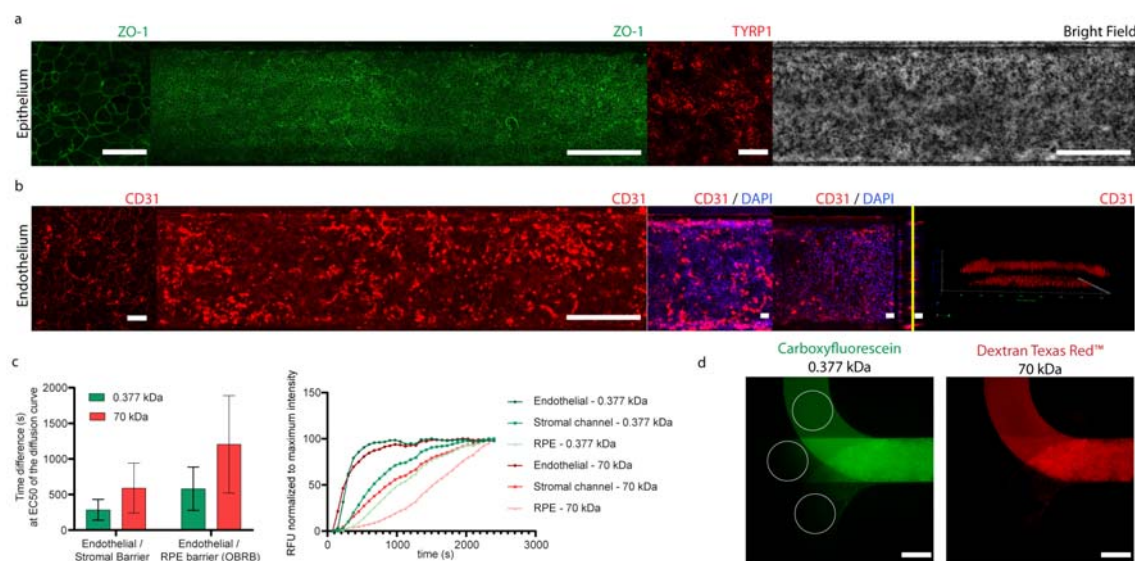

**Figure 2. Endothelial and outer blood-retina barrier (oBRB) characterization after 2 weeks in culture.** (a) Immunofluorescence staining demonstrating the phenotype and structure of the retinal pigmented epithelium as a confluent monolayer expressing the tight junction marker zonula occludens (ZO-1, in green) at high magnification (left) and throughout the whole cell culture surface on the chip (middle, long image of ZO-1, in green) as well as melanin production, demonstrated by the expression of TYRP1 (red) and pigmentation demonstrated in the bright field imaging (right, grey). (b) Immunofluorescence staining demonstrating the phenotype and structure of the endothelium formed by microvascular endothelial cells positive for CD31 (red), presenting a stronger staining in the cell junctions when cultured in the absence of RPE and melanocytes (left) than in co-culture (middle, long image of CD31, in red). The DAPI/CD31 staining represents the bottom endothelial layer (left), top endothelial layer (middle) and orthogonal side view of both, with a yellow line

corresponding to the bottom membrane. The 3D render (right) confirmed the presence of 2 confluent layers. (c) Quantification of the relative permeability of the endothelial (MVEC)/stromal and oBRB barriers when perfused with low (Carboxyfluorescein, 0.377 kDa) and high molecular weight (Dextran Texas Red, 70 kDa) fluorescence molecules. Relative permeability is presented as a measure of the lag time difference to achieve 50% of the compound concentration (right) extracted from the molecule diffusion kinetic curve ( $n=2$ , bars represent SD) (left) and a representation of the kinetic profile measured for one chip, normalized to the highest fluorescence intensity in each channel of the CoC and for both molecular weight molecules. (d) Representative images of the fluorescent measurements, labeled with white circles, performed to quantify relative permeability. The measurements were performed in each of the individual channel, where there is no channel overlap, on the inlet side of the chip. The top circle corresponds to the MVEC channel, the middle to the stromal channel and the bottom to the RPE channel. The images show a fluorophore filled MVEC channel after 552 seconds of perfusion. Scale bars are 500  $\mu\text{m}$ , except for square images and the orthogonal view in panels in A and B, where the scale bars represent 50  $\mu\text{m}$ .

### Choroidal stroma and melanocyte characterization

The melanocyte seeding process in the CoC was designed to achieve two different melanocyte densities, 5% and 50% (Figure 3A and B). Morphology, pigmentation, proliferation (Ki-67) and viability were characterized for high and low melanocyte cell densities after 2 weeks in culture (Figure 3A-B, respectively). Three-dimensional cell distribution and active production of melanin were confirmed by melanin autofluorescence imaging and by the presence of TYRP1 in these cells (Figure 3C). Interestingly, the main functional difference between the chips cultured with high and low melanocyte density was in IL-6, secreted proportionally to the melanocyte cell density, conversely to secretion of the pro-inflammatory cytokine TNF- $\alpha$  (Figure 3D).

In vivo, uveal melanocytes are located in the choroidal stroma and are essential for the normal ocular homeostasis and function, namely for light absorption, regulation of oxidative stress, immune regulation, angiogenesis and inflammation<sup>32</sup>. Uveal melanocyte size and pigmentation varies within ethnicities and species. Rhesus macaques feature 50 % of the choroidal tissue filled with melanocytes in opposition to 5 % observed for white humans, corresponding to a density of 34.2 uveal melanocytes per 10.000  $\mu\text{m}^2$  with an average size of 28.5  $\mu\text{m}^2$ <sup>28</sup>. The CoC aimed at recapitulating those cell densities with the low and high melanocyte densities, respectively, being able to address possible species differences for non-clinical drug development. Different melanocyte densities are accompanied by differences in melanin content with pharmacological implications such as binding of small molecule drugs to melanin<sup>33</sup> and by different IL-6 levels. IL-6 is secreted by both melanocytes and RPE and is a key cytokine for the immunological state of the eye involved in maintaining uveal tissue homeostasis<sup>34</sup>. IL-6 also plays a central role in ocular disease: intraocular IL-6 levels have been found elevated in a plethora of retinal diseases including uveitis, AMD and diabetic eye disease<sup>35,36</sup>. Interestingly, IL-6 and TNF- $\alpha$  were the only cytokines detected in human vitreous of controls<sup>36</sup>, which corresponds to the cytokine profile of the low melanocyte density condition of our model (Figure 3C). This condition was, hence, used for the further studies.



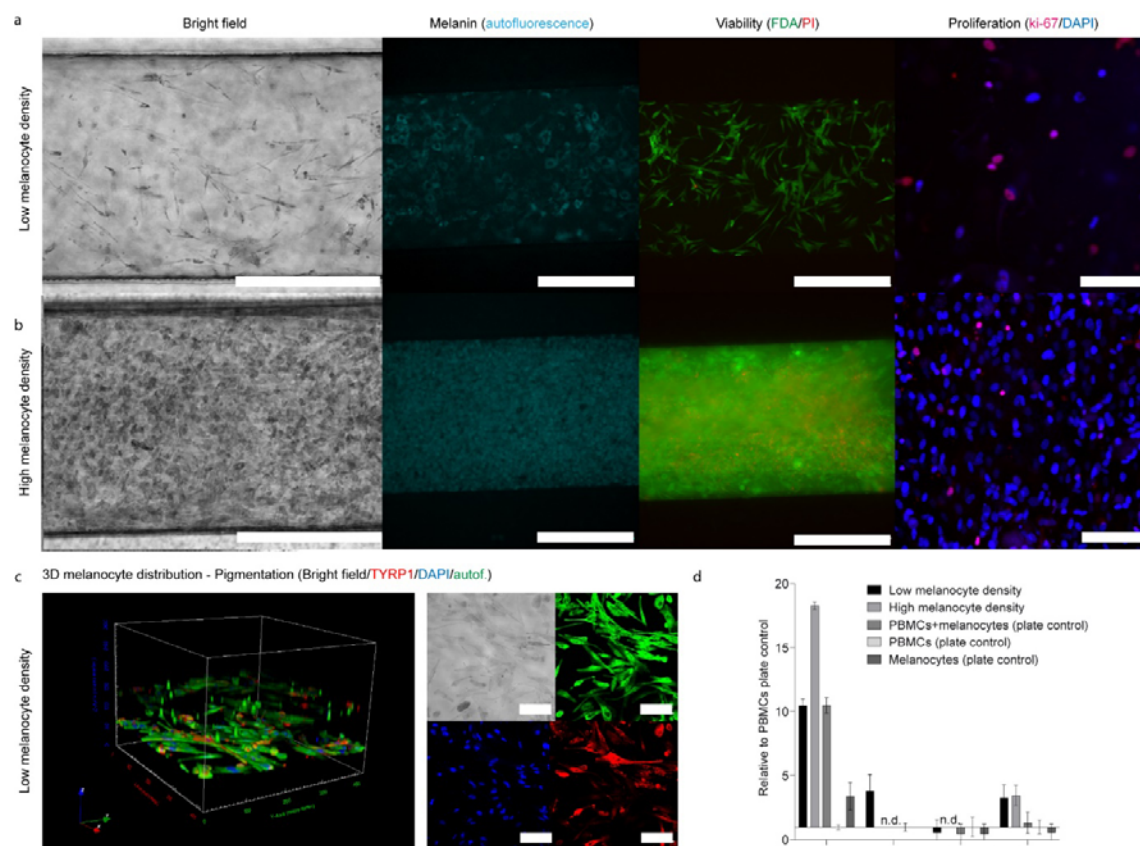

**Figure 3. Characterization of the melanocyte compartment after 2 weeks in culture** (a, b) Morphology of pigmented melanocytes seeded at low (a, top) and high (b, bottom) densities and embedded in the dextran hydrogel containing Arginylglycylaspartic acid (RGD peptide): Bright field images demonstrate pigmentation; autofluorescence shows melanin, FDA/PI labeling indicates viability (Epifluorescence imaging of the whole chip), and Ki-67 staining (Confocal imaging) a low proliferative state. Scale bar: 500  $\mu$ m (Ki-67 images: 100  $\mu$ m); (c) 3D representation of the cell distribution in the melanocyte compartment (left). Immunofluorescence microscopy highlighting pigmentation (bright field; top left), melanin autofluorescence (top right), cell nuclei (DAPI; bottom left) and the presence of TYRP1 (bottom right) (Confocal imaging). (d) Effect of melanocyte density on the cytokine secretion in the presence of peripheral blood mononuclear cells (PBMCs). The bars represent the average values  $\pm$  SEM (n=4).

### Perfusion of circulating immune cells

To integrate an immune component into the CoC, freshly isolated human peripheral blood mononuclear cells (PBMCs) were perfused through the endothelial channel. The perfusion process and parameters were carefully chosen to assure cell viability while avoiding immune cell activation that would lead to an uncontrolled and undesired immune cell response (Figure 4). The capacity of the immune cells to adhere to the membrane and migrate towards the melanocyte compartment was initially assessed in acellular chips. We perfused PBMCs and activated T cells (“Act”, treated with anti CD3/CD28 antigens) through chips containing either bare hydrogel or hydrogel supplemented with CCL19, a chemokine responsible for directing T cells from the blood stream into lymph nodes<sup>37</sup>. In the absence of T cell activation and CCL19, almost no immune cells were present in the melanocyte compartment whereas cell recruitment was clearly observable in the presence of CCL19 and T cell activation (Figure 4A).

In the second step, we perfused PBMCs and activated T cells through the fully assembled CoC to better understand the immune cell recruitment into the melanocyte compartment and evaluate if T

cell activation would mimic the disease phenotype of uveitis. After 24h of linear perfusion, more than 50% of the perfused immune cells remained in the chip (Figure 4B); moreover, cells in the effluent were not proliferative (< 5% of Ki-67 positive cells, Figure S1). The cell viability remained above 75 % for both PBMCs and activated T cells. Fraction of T cells positive for activation marker CD69 was 2-fold lower in the chip effluent than for plate controls (Figure 4C). In contrast to this, CD25, a later marker of T cell activation was not changed by activation, probably due to the short period of activation of 24h<sup>38</sup>. This suggests that activated cells stay in the chip, adhering to the endothelium and/or migrating towards the other compartments as also observed by quantitative image analysis of the entire chip and measurement of cytokines in the chip effluent. Treatment with CD3/CD28 antigens led to an increase in PBMC and T cell migration particularly towards the lower half of the melanocyte compartment (Figure 4D and 4E). T cell activation resulted in consistently higher cytokine levels for all tested cytokines. IL-10, particularly was not detected in PBMCs and detected at a low concentration in activated cells, consistent with the early time point of 24 h (Figure 4F). IL-6 mediates T cell migration in the presence of extracellular matrix, requiring integrin signal transduction pathways and a gradient for chemotactic migration<sup>39</sup>. Therefore, IL-6 increase could explain the increased recruitment of immune cells. This is reinforced by the higher proportion of immune cells that migrated into the melanocyte compartment in high melanocyte density chips: 3-fold increase for all immune cells and 7-fold for T cells (Figure S2), when perfused with PBMCs. In high melanocyte density chips, T cell activation did not result in an increase of immune cell recruitment (Figure S3).

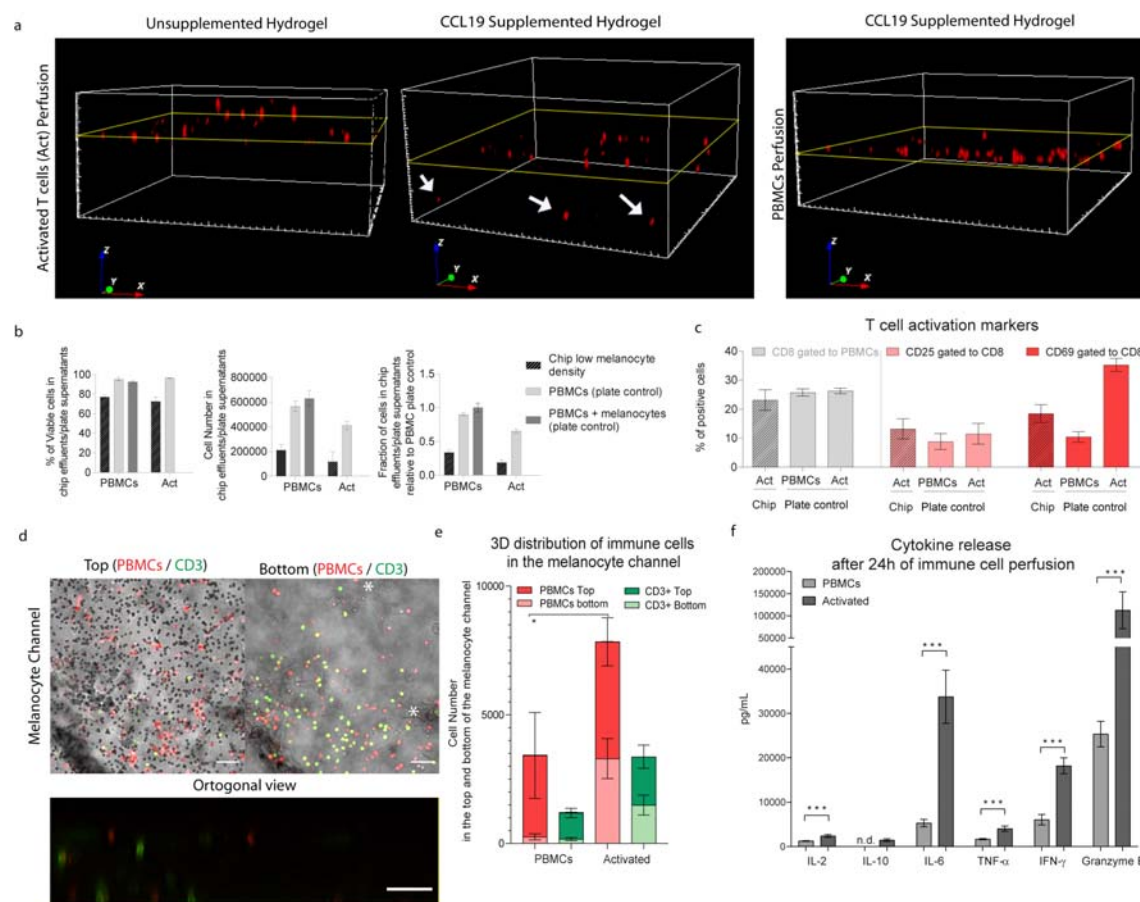

**Figure 4. Validation of PBMC perfusion, viability, recruitment and cytokine release upon activation with anti CD3/CD28 antigens (Act).** (a) 3D representations of the evaluation of immune cell recruitment on chip containing only hydrogel (left) or supplemented with CCL19 (middle and right) and perfused with Deep Red cell tracker labeled PBMCs, treated with anti CD3/CD28 antigens (middle and left) or non-treated (right) showing that in the absence of a stimuli, there is no immune cell recruitment. The yellow line represents the position of the bottom membrane of the chip. (b) Evaluation of the cells



collected after 24h of perfusion on its viability (left), concentration (middle) and fraction of recovery relative to the plate control (n=4-15) measured by flow cytometry. The effluents were collected from the chips with low melanocyte density (black) and from control well plates with (dark grey) or without co-culture with melanocytes (light grey). (c) Quantification of CD8 positive cells and of T cell activation markers CD25 and CD69 within the CD8 positive population by flow cytometry analysis of the effluents in the chips with low melanocyte density (striped bars) and on the plate controls (n=4-8). (d) Evaluation of the immune cell recruitment towards the 3D melanocyte compartment in chips with low melanocyte density and activated (Act) distinguishing PBMCs (red) and T cells (green, labeled with an anti-CD3 antibody) within the melanocytes (\*). The figure shows the top of the compartment where the chip bottom membrane is located and its pores are focused (right) and the bottom of the compartment (left), with an orthogonal representation of the whole chip height (bottom). Scale bar is 50  $\mu$ m. (e) Quantification of immune cell recruitment by image analysis of the whole chip with low melanocyte density, distinguishing PBMCs (cell tracker labeled prior perfusion) and T cells (CD3 post fixation staining) in the top (dark red and green) and bottom (light red and green) halves of the melanocyte compartment in the chips with low melanocyte density. Statistical analysis represents the comparison of total immune cells between chips perfused with PBMCs and chips perfused with activated cells (\*  $P < 0.1$ , n=4 for NT and n=12 for Act). (f) Quantification of the cytokines IL-2, IL-10, IL-6, IFN- $\gamma$ , TNF- $\alpha$  and granzyme B on the effluents of chips after 24h of perfusion. Statistical analysis represents the comparison between chips with low melanocyte density perfused with PBMCs and chips perfused with activated cells (\*\* $P < 0.01$ , n=3-5). Bars represent averages  $\pm$  SEM. Statistical analysis is detailed in Supplementary material 2, including detailed information of the number of biological replicates per group.

## Exposure of the immunocompetent CoC to immunomodulatory drugs

### Cyclosporine A

The capacity of the CoC to respond specifically to immunomodulatory stimuli was evaluated using the well-known immunosuppressor Cyclosporine A (CsA). The CoCs were exposed to different doses of CsA while perfused with PBMCs activated via anti CD3/CD28 antigens. CsA treatment did not significantly affect immune cell viability (Figure 5A). However, the cell recovery in the effluents was significantly higher for CsA treated CoCs than for controls with activated T cells or PBMCs (Figure 5B). The immunosuppressing effect of CsA was observed in a reduction on CD69 expression in CD8a positive cells, statistically significant for both concentrations (Figure 5C), a reduction of all measured cytokines in the chip (Figure 5D) and of all except for IL-2 in the plate controls (Figure 5E). The IL-2 increase in chips caused by T cell activation is slightly reverted in the high CsA condition on the chip but not on the plate controls. Most importantly, these effects correlate with CsA concentration dependent reduction in immune cell recruitment. Treatment with high concentrations of CsA reversed the infiltration of immune cells by 2-fold relative to activated T cells and 1.8-fold relative to low CsA condition (Figure 5F and 5G).

CsA was selected not only for its immunosuppressive properties, but also for its effects on improving uveitis symptoms<sup>40</sup>. CsA has a paradoxical effect on T cells since it is able to suppress T cell activation and proliferation at high doses but, at lower doses, it is reported to have an immunomodulatory effect with potential application for immuno-oncology therapies<sup>41</sup>. The mechanism that supports the effect of this drug for treating uveitis is that uveitis is characterized by T cell activation and infiltration into the choroidal tissue<sup>8,42</sup>, as well as other inflammatory cells including B cells and macrophages<sup>33,34</sup>. As mentioned above, IL-6 is increased in posterior uveitis<sup>36</sup> and identified as a potential therapeutic target<sup>43</sup>. Our data show a similar biological response when the chip is treated with activated cells covered by cytokine production (IL-6 increase) and immune cell recruitment to the choroid. Taking a closer look into the correlation of cytokine secretion in the CoCs and the immune cell recruitment, CsA effectively inhibits IL-2 production in vivo and in vitro<sup>44,45</sup>, as observed for the high CsA concentration in the chip but not in the plate control. IL-2 is required to maintain the activation state of T cells<sup>46</sup>. Activation of T cells only led to an increase of IL-6 in the CoCs, but not in the plate control. In addition to melanocytes and RPE<sup>34</sup>, monocytes can also produce IL-6, promoting the proliferation and migration of T cells in a concerted way<sup>39</sup>. CsA is able to directly reduce IL-6 production by monocytes<sup>47</sup>, in agreement with the 10-fold reduction of IL-6 levels in CsA treated chips (Figure 5D). The monocyte role was not explored in depth in the present work. However,

monocyte migration towards uveal melanocytes after being in contact with conditioned medium from activated T cells that contains increased IFN- $\gamma$  and TNF- $\alpha$  has been described in vitro<sup>48</sup>. T cells produce those cytokines after T cell receptor stimulation and induce monocyte production of GM-CSF. Consequent monocyte activation promotes monocyte adherence, migration, chemotaxis<sup>49</sup>. Our data also show elevated IFN- $\gamma$  and TNF- $\alpha$  in the CoCs perfused with activated T cells, which might suggest a T cell dependent monocyte activation and migration, represented by the CD3 negative PBMCs population, which was reduced by more than 2-fold with high CsA concentrations (Figure 5F). Interestingly, in the chips perfused with activated T cells, only 50% of the migrated cells were CD3 positive, independently of their depth of penetration into the melanocyte compartment. For chips perfused with PBMCs, most of the cells were in the upper half of the compartment, near the endothelial cells (Figure 5F). This was not reverted by CsA treatment suggesting that CsA treatment affected the number of cells that infiltrate the melanocyte compartment, but not the spatial distribution of immune cell types. To observe the effect of activation on T cell proliferation and possibly a difference in the spatial distribution of immune cell types, the evaluation period would need to be increased because 24h might be insufficient. CsA was also reported to reduce T-cell trans-endothelial migration<sup>50</sup>. That effect is reflected by the CsA-induced reduction of the number of T cells by 1.2- and 1.8-fold for low and high CsA, respectively, relative to the activated T cells.

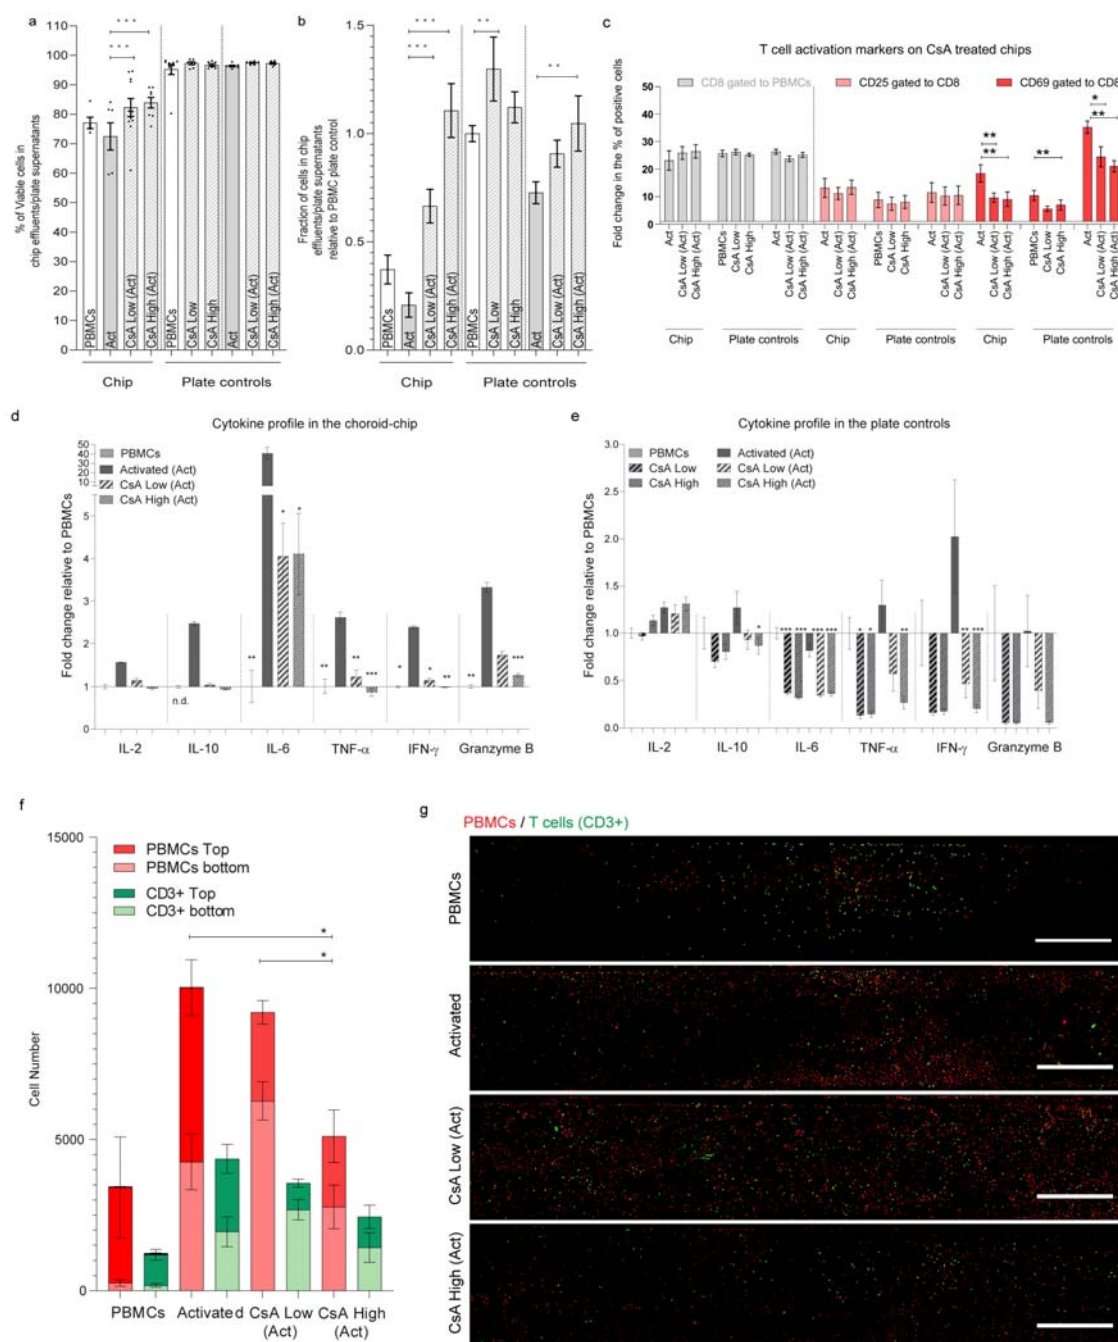

**Figure 5. Effect of the immunosuppressor drug Cyclosporine (CsA) on the Immuno-competent CoC with low melanocyte density after 24h of perfusion or cell culture (plate controls) respectively, in PBMCs, activated PBMCs (Act), treated and non-treated with high (500 ng/mL) and low (100 ng/mL) CsA concentrations.** (a) Viability of the immune cells collected in the chip effluents and plate control supernatants (n=3-10, the dots represent each data point). (b) Fraction of cells recovered in in the chip effluents and plate control supernatants relative to the number of recovers cells in the PBMC control (n=3-10). (c) Flow cytometry quantification of CD8 fraction and the T cell activation markers CD25 and CD69 in the CD8 fraction in activated PBMCs (Act) with and without CsA treatment (n=4-10). (d) Cytokine profile in the choroid chip in activated PBMCs (Act) with and without CsA treatment relative to PBMCs (n=6-12). (e) Cytokine profile in plate in PBMCs and activated PBMCs (Act) with and without CsA treatment relative to PBMCs (n=5). (f) Quantification of immune cell recruitment by image analysis of the whole chip, distinguishing PBMCs (cell tracker labeled prior perfusion) and T cells (CD3 post fixation staining) in the top (dark red and green) and bottom (light red and green) halves of the melanocyte compartment chips with low melanocyte density. Statistical analysis represents the comparison of total immune cells

between chips perfused with PBMCs and chips perfused with activated cells (\*  $P < 0.1$ ,  $n=4-8$ ). (g) Representative images of the melanocyte bottom compartment containing labeled PBMCs (Cell tracker, red) and T cells (CD3, green) represented as maximum intensity projections for each of the analyzed condition. Scale bar = 500  $\mu\text{m}$ . Bars represent Averages  $\pm$  SEM. Statistical analysis represents the comparison of the CsA treatment in activated cells with the same condition not exposed to CsA (\*  $P < 0.1$ , \*\*  $P < 0.05$ , \*\*\*  $P < 0.01$ ), unless otherwise labeled. Statistical analysis is detailed in Supplementary material 2, including detailed information of the number of biological replicates per group.

### **Bi-specific T cell engagers (TCBs)**

Bi-specific T cell engagers (TCBs) have been investigated for immuno-oncology therapies for more than 30 years. However, there are still unresolved potential safety liabilities for this mode of action revealed in toxicity studies with non-human primates and in clinical studies<sup>51</sup>. TCBs are antibodies that target a constant-component of the T cell/CD3 complex and a tumor-associated antigen (TAA). The relative abundance of T cells in blood, and their cytotoxicity and proliferation capacity upon activation make T cells an effector cell of choice. To test the capacity of the CoC for immune safety assessment, we tested two antibodies, labeled as A and B. Both contain the T cell receptor binding domain but lack the TAA. Both TCBs were compared with a commercially available reagent developed to activate and expand human T cells via exposure to beads containing anti CD3/CD28 antigens. The PBMC suspension was supplemented with the different T cell activators and then perfused through the CoC for 24h as described for the CsA study. The PBMCs recovered in all effluents showed good viability (Figure 6A). The treatment with TCB B led to a higher cell recovery than TCB A or with the activated condition after chip perfusion and in the plate controls (Figure 6B). Both TCBs led to a similar low increase in IL-2 as for the commercial T cell activator (Act). TCB B elicited minimal cytokine release, with some increase mainly evident for granzyme B. TCB A led to significantly higher levels of TNF- $\alpha$  and IFN- $\gamma$  when compared to the commercial activator, while this latter showed higher levels for IL-10, IL-6 and granzyme B. This is particularly interesting since T cell secretion of TNF- $\alpha$  and IFN- $\gamma$  leads to monocyte migration towards uveal melanocytes<sup>49</sup>, as discussed above. This could lead to an untargeted, undesired and possibly detrimental immune response. Our data show that TCB B is leading to similar T cell recruitment to the melanocyte compartment as TCB A and the activated condition but to less recruitment of CD3 negative cells. These observations and the higher presence of cells in the chip effluent in TCB B treated chips support its higher efficiency on T cell-specific recruitment while producing lower levels of pro-inflammatory cytokines.

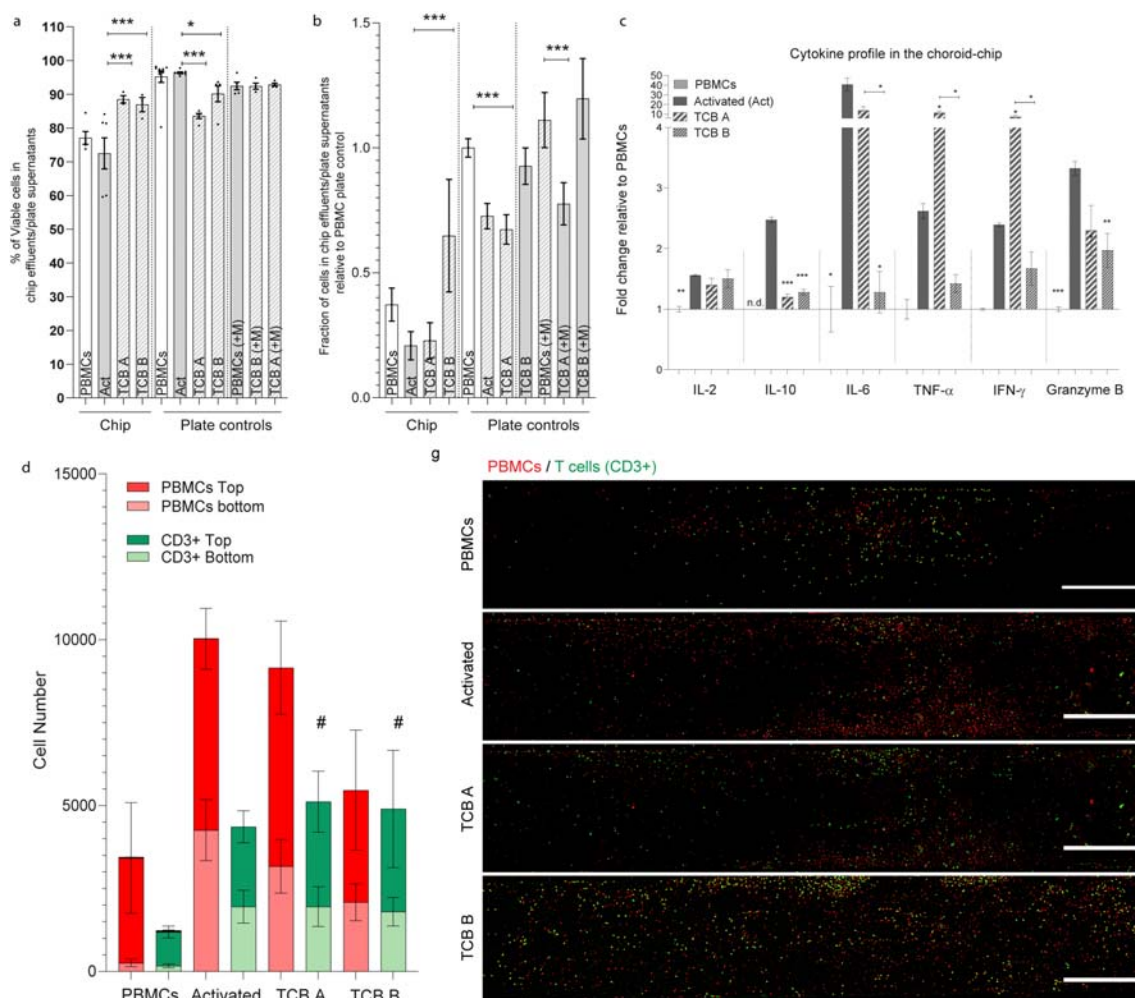

**Figure 6. Effect of the TCBs on the Immuno-competent Choroid-chip** with low melanocyte density after 24h of perfusion or cell culture (plate controls) respectively, in PBMCs treated and non-treated with TCB A or TCB B (5  $\mu$ g/mL). (a) Viability of the immune cells collected in the chip effluents and plate control supernatants (n=3-10, the dots represent each data point). (b) Fraction of cells recovered in the chip effluents and plate control supernatants relative to the number of recovered cells in the PBMC control (n=3-10). (c) Cytokine profile in the TCB A and TCB B treated choroid chips relative to PBMCs (n=6-12). (d) Quantification of immune cell recruitment by image analysis of the whole chip, distinguishing PBMCs (cell tracker labeled prior perfusion) and T cells (CD3 post fixation staining) in the top (dark red and green) and bottom (light red and green) halves of the melanocyte compartment chips with low melanocyte density (n=3-9). (e) Representative images of the melanocyte compartment containing labeled PBMCs (Cell tracker, red) and T cells (CD3, green) represented as maximum intensity projections for each of the analyzed condition. Scale bar = 500  $\mu$ m. Bars represent Averages  $\pm$  SEM. Statistical analysis represents the comparison of the TCBs treatment in PBMCs with cells activated with antiCD3/CD28 beads (\* P < 0.1, \*\* P < 0.05, \*\*\* P < 0.01), unless labeled otherwise, and the comparison of the total and bottom compartments of the TCBs treatment in PBMCs with non-treated PBMCs (# P < 0.1). Statistical analysis is detailed in Supplementary material 2, including detailed information of the number of biological replicates per group.

## Conclusion

Altogether, this microphysiological CoC model recapitulates key features of the human choroid such as cellular composition, pigmentation, tissue-specific endothelial barriers as well as cytokine secretion and responds to immunomodulatory strategies, both to immunosuppressors and immunoactivators. It was also sensitive to detect differences in the immunological responses to two TCBs providing hints on their potential safety profile. The data presented here sustain the relevance

of using an advanced cell culture system integrating several cell types involved in the immune response of a specific tissue to support pharmaceutical compound ranking and decision making. The immune response in the CoC was shown to be sensitive to the mechanisms of T cell activation and suppression, key aspects for a human-relevant healthy and diseased in vitro model. Furthermore, the processes established for building the CoC model can potentially be translated to other tissues where the stromal, endothelial and epithelial cells are key elements of mechanisms of disease and/or toxicity. This could help building a toolbox of in vitro models recapitulating aspects of the immune system to study immune-oncology therapies such as checkpoint inhibitors, TCBs and CAR-T cells.



## **Materials and Methods**

### **Microfluidic chip fabrication by UV-lithography and replica molding**

The CoC is based on a tailored five-layered microfluidic platform comprising three micro-structured polydimethylsiloxane (PDMS; Sylgard 184, Dow Corning, USA) layers, which are separated by two isoporous, semipermeable PET membranes (Figure 1A). 100  $\mu\text{m}$  high channel structures in the PDMS pieces were generated using two differently patterned master wafers fabricated via photolithographic processes<sup>52</sup>. The PDMS elastomer base and curing agent were mixed in a 10:1 (w/w) ratio and desiccated to remove air bubbles. Two different replica molding approaches were conducted as described previously<sup>52</sup>. Standard molding was used to obtain 3 mm and 0.5 mm thick PDMS pieces with channel structures for the RPE and Melanocyte layers, respectively. Curing was achieved at 80 °C for 4 h. The endothelial layer was fabricated using exclusion molding to achieve a 0.1 mm thin layer with through hole channel structures. Layers were cured at 80 °C for 1 h. Commercially available semipermeable polyethylene terephthalate (PET) membranes ( $r_p=0.3\mu\text{m}$ ;  $p_p=0.8\times 10^5$  pores per  $\text{cm}^2$ ; TRAKETCH® PET 3.0 p S210 $\times$ 300, SABEU GmbH & Co. KG, Northeim, Germany) were functionalized by a plasma-enhanced, chemical vapor deposition (PECVD) process as described previously<sup>52</sup>. Microfluidic chips were assembled in four consecutive bonding steps: (i) RPE layer to 1<sup>st</sup> membrane, (ii) RPE layer-membrane assembly to endothelial layer, (iii) RPE-membrane-endothelial assembly to 2<sup>nd</sup> membrane, and (iv) the entire assembly to the melanocyte layer. Before bonding, all parts were cleaned thoroughly using isopropanol and blow-dried with a nitrogen pistol. Dust was removed using standard adhesive tape. In all steps, bonding was achieved by oxygen plasma activation (50 W, 0.2  $\text{cm}^3\text{m}^{-1}$   $\text{O}_2$ ; Diener Zepto, Diener electronic GmbH + Co. KG, Ebhausen, Germany) for 15 sec. To enhance bonding strength, assembled parts were placed at 80 °C after each step for at least 10 minutes and overnight after assembly of the entire chip.

#### *Chip preparation for experiments*

Prior to cell injection, all chips were  $\text{O}_2$ -plasma sterilized (50 W, 0.2  $\text{cm}^3\text{m}^{-1}$   $\text{O}_2$ ) for 5 min. Afterwards, channels were filled with Dulbecco's phosphate-buffered saline without  $\text{MgCl}_2$  and  $\text{CaCl}_2$  (PBS; Sigma-Aldrich Chemie GmbH, Steinheim, Germany) and centrifuged under sterile conditions for 3 min at 200 x g to remove residual air from the systems.

### **Cell isolation and culture**

#### *Cell sources*

All research was carried out in accordance with the rules for investigation of human subjects as defined in the Declaration of Helsinki. Patients gave a written agreement according to the permission of the Landesärztekammer BadenWürttemberg (IRB#: F-2012-078; for normal skin from elective surgeries) for the collection of primary melanocytes and microvascular endothelial cells and with the ethical Committee of the Eberhard Karls University Tübingen (Nr. 678/2017BO2, for iPSC derived retinal pigmented epithelial cells and Nr. 495/2018-BO02 for the isolation of PBMCs from whole blood). All primary mature melanocytes and microvascular endothelial cells were isolated from biopsies that were taken from female, pre-obese donors (BMI 25.0 - 29.9, as per the WHO classification), aged 25 to 65. Human PBMCs were isolated from healthy donors (BMI <25.0, as per the WHO classification), aged 25 to 35.

#### *Retinal pigmented epithelial cells*

RPE cells were obtained from human induced pluripotent stem cells as described previously<sup>53</sup>. RPE cells were maintained in B27-retinal-differentiation-medium (BRDM) consisting of DMEM/F12 and DMEM, high glucose (1:1) with 2% B27 without vitamin A, 1% non-essential aminoacids and 1% antibiotic antimycotic solution (all from ThermoFisher Scientific, USA). Cell culture media was changed daily and cells were used up to passage three. Passaging was performed using Accumax at 37 °C and 5%  $\text{CO}_2$  for 10-30 min, depending on the adherence and passage. Cells were seeded at 75,000 cells per  $\text{cm}^2$  in BRDM supplemented with 10% FCS, 20 ng/mL of EGF (Cell Guidance Systems),

20 ng/mL of FGF2 (Cell Guidance Systems), 10  $\mu$ M of ROCK-inhibitor Y-27632 (Selleck Chem). After 24 h the medium was changed to unsupplemented BRDM and changed daily thereafter. Passaging was never performed earlier than every 4 weeks to assure a pigmented phenotype.

#### *Primary microvascular human endothelial cells and melanocytes*

Primary MVECs and melanocytes were isolated from adult human skin tissue of plastic surgeries received from Dr. Ulrich E. Ziegler (Klinik Charlottenhaus, Stuttgart, Germany). Visible blood vessels and connective tissue were removed and the skin biopsies were cut into 8 cm<sup>2</sup> pieces and further cut into strips. Tissues were incubated with a 2 U/ml dispase solution (Serva Electrophoresis, Heidelberg, Germany) in PBS overnight at 4°C. Samples were then washed in PBS and epidermis and dermis were separated for further melanocyte and microvascular endothelial cell isolation, respectively. Human melanocytes were isolated using 0.05 % trypsin/EDTA for 10 min at 37 °C. Reaction was stopped with 5% FCS and cells were collected through a 100 mm mesh. After centrifugation at 200 x g for 5 min, cells were re-suspended in melanocyte growth media and seeded to a T75 cell culture flask. Isolation of MVECs from the dermis was achieved by incubation of dermis strips in 0.05 % trypsin/EDTA for 40 min at 37 °C, followed by washing with PBS and mechanical collection of cells using a cell scraper. Cells were stripped through a 100 mm mesh and then centrifuged at 200 x g for 5 min. Cells were cultured in endothelial cell growth media in a T75 cell culture flasks. Both melanocytes and endothelial cells were cultured with gentamicin for the first 10 days of culture and used in passage 2 or 3 for this study.

#### *Peripheral blood mononuclear cells*

PBMCs were isolated from whole blood using the MACSprep PBMC Isolation kit (Milteny Biotec), according with the manufacturer instructions. Blood was collected up to 1 h before isolation. After isolation, PBMCs were labeled with CellTracker™ Deep Red Dye (ThermoFisher Scientific) at 1  $\mu$ M in X-vivo medium (Biozym) for 45 min at 37 °C and protected from light. The cell concentration and viability were monitored using the Guava® ViaCount™ Reagent (Luminex) by flow cytometry using a Guava EasyCyte HT (Guava, Luminex) according to the manufacturer instructions.

### **Cell seeding on the choroid-chip**

#### *Coating*

Prior to cell injection, the RPE channel was coated with 50  $\mu$ L of 50  $\mu$ g/mL laminin in DMEM/F12 and DMEM, high glucose (1:1) for 2 h at 37 °C, 95 % Humidity, 5 % CO<sub>2</sub> (will be referred to as “incubation conditions” in the following). Afterwards, the endothelial channel was coated using 50  $\mu$ L of 20  $\mu$ g/mL of fibronectin (Sigma-Aldrich) and 100  $\mu$ g/mL collagen type I<sup>54</sup> in PBS incubated for 1 h.

#### *RPE seeding*

RPE cells were passaged as described above and seeded in the top channel using a filtration method. Briefly, 40  $\mu$ L of cell suspension at a concentration of 1.0 x10<sup>6</sup> cells/mL was added to the RPE channel while the outlet of the same channel remained closed, as well as the inlet of the endothelial channel on the side of cell seeding and both inlet and outlet of the stromal channel. This forced the medium to flow through the membrane and the cells to block the pores until the full length of the membrane was completely covered with cells. The cells were left to adhere in the incubator for 1 h. After incubation, filtered pipet tips, with 50  $\mu$ L of supplemented BRDM media each, were added to the in- and outlet of the RPE channel, while the other two channels were completely plugged. The medium was replaced by unsupplemented BRDM for additional 24 h prior to MVEC seeding.

#### *MVEC seeding*

MVEC seeding was conducted after RPE seeding and similar to the RPE seeding method with minor adaptations: The RPE channel in- and outlet were closed off completely while the stromal channel inlet was closed and its outlet open. Thirty  $\mu$ L of cell suspension (concentration of 1.0 x10<sup>6</sup> cells/mL) was injected into the endothelial cell inlet. The chip was immediately flipped and placed for 15 min in

an incubator, allowing cells to attach to the top membrane. Afterwards, the chip was flipped back to the upright position and placed for an additional hour in the incubator. Filter pipet tips filled with 100  $\mu$ L ECGM media each were added to the in- and outlet of the endothelial channel for 24 h of static culture. RPE and stromal channels were completely closed off.

### *Melanocyte seeding*

Melanocytes, embedded into a dextran-CD hydrogel, supplemented with RGD peptide (Cellendes; Catalog no. G93-1), were injected into the stromal channel of the chip, 24 h after MVEC seeding. The hydrogel was prepared according to manufacturer instructions. The melanocytes were passaged as described above and the average cell diameter assessed using ImageJ (Supplementary material 3). By calculating the proportion of the cell volume to the total stromal channel volume, high and low melanocyte concentration were achieved corresponding to the choroid of a white human (5%) and of a rhesus macaques (50 %) as described in the literature<sup>28</sup>. The total volume of the stromal channel corresponds to 1.5  $\mu$ L and a volume of 5  $\mu$ L was used for cell seeding and an expansion factor of 3.68 was used to account for the melanocyte morphology change while spreading. The calculation of cell volume was performed prior to each seeding to factor in donor and passage variability on cell size. Prior to melanocyte seeding, the chip was connected to a syringe pump to actuate a media perfusion through the endothelial channel at a flow rate of 5  $\mu$ L/h with positive pressure. The cell-hydrogel suspension was injected into the stromal channel, which was subsequently closed. Chips were then placed in the incubator. Perfusion rate was ramped up to 20  $\mu$ L/h (after 1h) and finally to 40  $\mu$ L/h (after 24 h); the perfusion rate maintained throughout the entire experiment. Chips were cultured for two weeks before perfusing PBMCs. For the immune cell recruitment experiments in acellular chips, CCL19/MIP-3 $\beta$  (R&D Systems) was added to the hydrogel for a final concentration of 250 ng/mL. Plate controls were performed for the cytokine measure in the presence and absence of PBMCs. For that, melanocytes were seeded in 24-well plates at the density of 10.000 cells/cm<sup>2</sup> and kept in culture in parallel with the chip culture until the immune cell perfusion.

### **Immune cell perfusion and treatment**

#### *Immune cell perfusion*

Isolated and pre-labeled PBMCs were cultured at a concentration of 1.0x10<sup>6</sup> cells/mL. Plate controls were performed for the flow cytometry and for the cytokine measurements in all treated and non-treated conditions in static 24-well cell culture plates. The total volume for each chip perfused and the plate controls was kept equally at 960  $\mu$ L, assuring the same cell concentration and treatment concentration. Chips were cultured in an incubator that allowed for chip handling under sterile conditions (Incubator FlowBox™, ALS, Jena, Germany). For PBMC perfusion through the endothelial channel, the outlet of the channel was equipped with a reservoir holding the PBMC cell suspension, while the pump was changed to the withdraw mode at 40  $\mu$ L/h, maintaining the flow direction. After 24 h, the chip effluents and plate control supernatants were collected for further analysis and the chips were fixed for immunofluorescent labeling.

#### *T cell activation*

T cell activation was achieved by adding 5  $\mu$ L of anti-CD3/CD28 antigens (TransAct, Milteny Biotec) to the 1.0x10<sup>6</sup> cell suspension, being present for the 24h of perfusion in the chip or static in the plate controls.

#### *Cyclosporin*

Cyclosporin (CsA) treatment was performed for the 24 h of perfusion using two concentrations, which were selected to mimic low and high plasma concentrations of 100 and 500 ng/mL<sup>41,55</sup> and to evaluate a dose response of its effects on chips perfused with activated T cells. Therefore, CsA treatment on chip was performed only in combination with the T cell activation. PBMCs were also treated with CsA in the plate controls to confirm that CsA treatment is not affecting the immune cells viability and cytokine production.

### *T cell bispecific antibody*

T cell bispecific antibody (TCB) treatment was performed for the 24h of perfusion. Both TCB A and TCB B were added at the concentration of 5 µg/mL to PBMCs.

### **Evaluation of immune cells in chip effluents and plate control supernatants**

#### *Cell counting and viability*

The effluents of the immune cell perfusion were collected and centrifuged at 200 x *g* for 5 min. The cell pellet was re-suspended in 950 µL of PBS for evaluation of cell number and viability using the Guava® ViaCount™ Reagent (Luminex) by flow cytometry (Guava, Luminex), according with the manufacturer instructions, and for flow cytometry analysis. The supernatant was centrifuged for 10 min at 10.000 x *g* at 4 °C to remove cell debris and stored at -80 °C for further analysis of the cytokine profile.

#### *Flow cytometry*

For flow cytometry analysis cells were washed and labeled with anti-CD8a-PerCP, anti-CD25-APC and anti-CD69-FITC (Biolegend) for 20 min at 4°C. Antibodies were used at concentrations recommended by the manufacturer. As buffer solution and for the washing step PBS containing 2 mM of EDTA and 0.1 % of BSA was used. Autofluorescence and isotype controls were performed to confirm similar levels of unspecific signal in every staining. Table 1 specifies the used antibodies and isotype controls. The analysis was performed using the Guava InCyte software. The PBMCs were gated on the FCS/SSC plot before gating for CD8a. The quantification of the fraction of CD25 and CD69 positive cells was performed for the CD8a positive population (Figure S4).

**Table 1. Flow cytometry antibodies and isotype controls**

| Fluorophore | Reactivity | Antigen | Clone   | Lot Number | Product Reference      |
|-------------|------------|---------|---------|------------|------------------------|
| APC         | anti-human | CD25    | BC96    | B258747    | <a href="#">302610</a> |
| FITC        | anti-human | CD69    | FN50    | B224681    | <a href="#">310904</a> |
| PerCP       | anti-human | CD8a    | HIT8a   | B241517    | <a href="#">300922</a> |
| FITC        | Mouse      | IgG1,k  | MOPC-21 | B199152    | <a href="#">400107</a> |
| APC         | Mouse      | IgG1,k  | MOPC-21 | B257953    | <a href="#">400119</a> |
| PerCP       | Mouse      | IgG1,k  | MOPC-21 | B226117    | <a href="#">400147</a> |

#### *Cytokine measurement*

The samples were thawed and analyzed using the LegendPlex Human CD8/NK Panel (Biolegend), according with the manufacturer instructions, using a Guava EasyCyte HT (Guava, Luminex). The samples were diluted 1:100 to assure that the analyses are within the calibration curves. The analysis was performed on the LEGENDplex™ v.8.0 software.

### **Immunofluorescence staining**

Chips were washed twice with 100 µL of PBS by gravity flow through the endothelial and RPE channel and then fixed with 4% ROTI®Histofix solution (Roth) for 10 min at room temperature (RT) using the same method. The chips were washed with PBS after fixation and stored until further processing in PBS at 4°C. Blocking of unspecific binding and permeabilization was achieved by incubation with a 3% BSA and 0.1 % Triton-X solution in PBS- for 30 minutes at RT. Chips stained for CD3 were not permeabilized to avoid losing the cell tracker label in the PBMCs. All primary and secondary antibodies, specified in table 2, were used at dilutions of 1:50 and 1:100, respectively. Using 50 µL of

antibody solution per chip, primary antibodies were incubated overnight at 4 °C and secondary antibodies for 1 hour at RT.

High antibody concentrations were tested and were required due to the high tissue to media ratio. Chips were washed three times with PBS after each of the antibody incubation steps using gravity flow. Following the incubation with the secondary antibodies, chips were incubated with DAPI in 0.2% saponin solution in PBS for 45 min at RT. Chips were washed three times each with 0.2 % saponin solution in PBS and PBS only, and then stored at 4 °C until imaged.

Table 2. Immunofluorescence antibodies

| AB              | Supplier, Reference   | Host   | Reactivity |
|-----------------|-----------------------|--------|------------|
| CD-1 (PECAM-1)  | Dako, M0823           | Mouse  | Human      |
| ZO-1            | ThermoFisher, 40-2200 | Rabbit | Human      |
| TYRP1           | Abcam, 3312           | Mouse  | Human      |
| Ki-67           | R&D Systems, AF7617   | Sheep  | Human      |
| CD3-FITC        | Biolegend, 300406     | Mouse  | Human      |
| Alexa Fluor 488 | ThermoFisher, A11008  | Goat   | Rabbit     |
| Alexa Fluor 546 | ThermoFisher, A11003  | Goat   | Mouse      |
| Alexa Fluor 546 | ThermoFisher, A21098  | Donkey | Sheep      |

### Permeability assays

For the evaluation of the endothelial and outer blood-retina barrier, chips were perfused with Carboxyfluorescein (0.377 kDa, Sigma, 21877) and Dextran Texas Red (70 kDa, Thermo Scientific, D1830) added to the EGCM media at concentrations of 100  $\mu$ M and 14.3  $\mu$ M, respectively. Compounds and concentrations were based on previous studies<sup>30</sup>. Image acquisition was performed in the dark using an incubator chamber that was fitted to the microscope stage, and set to 37°C, using the inverted Leica DMI8 fluorescence microscope. Images were acquired of each channel (BF, Cy 5, FITC) every 15 sec over a period of 45 min. As a reference, an image was taken prior to perfusion with the fluorescent dye solution at time point 0 min (t<sub>0</sub>). The images were acquired in the inlet of the three channels and analyzed as described in Figure 2D. Chips were perfused at a flow rate of 40  $\mu$ L/h using negative pressure and the same flow direction. For quantification of the fluorescent intensities of the different markers, the mean grey value of each channel was analyzed for each time point using ImageJ2. The fluorescence intensities were plotted against the time and normalized to the minimum (background) and to the maximum intensity in each channel. A non-linear curve fit, agonist vs. response, was applied to each dataset to determine the EC<sub>50</sub>, *i.e.*, the time where 50% of the intensity was achieved in each channel using Graphpad Prism software.

### Confocal Image Acquisition and Analysis

#### *Acquisition*

Whole chips were imaged using a Zeiss LSM 710 version 34ch Quasar NLO equipped with the inverted microscope platform Axio Observer.Z1. All images were acquired with an EC Plan-Neofluar 10x/0.30 M27 air objective. The sample was excited with three different lasers. A HeNe laser was used to excite the red cell tracker at 633 nm and emission was measured at 638 nm – 755 nm. FITC and DAPI were excited by an argon laser at 488 nm and Diode 405-30 at 405 nm, respectively. Emissions of these fluorochromes were measured at 495 nm– 630 nm and 410 nm – 501 nm, respectively. The pinhole of the red, green and blue channel was set to 90  $\mu$ m, 23  $\mu$ m and 17  $\mu$ m, respectively. Digital gain was constantly kept at 1.0 for all channels. The gain master, that controls

the analog amplification of voltage in the photon multiplier tube (PMT) and thus the sensitivity of the detector to the signal, was set individually for each channel and kept the same for all chips analyzed. For transmitted light images, in the figures referred to as bright field for simplicity reasons, the transmission photo multiplier tube (T-PMT) was used and set individually for each chip. For the quantification of cell migration, the melanocyte compartment of the chip was captured in 8 tiles. Each tile was imaged as 43 stacks from bottom ( $z=0$ ) to the top in 3  $\mu\text{m}$  steps, covering the whole thickness of the melanocyte layer. Images were acquired using ZEN version (2.1).

### *Image Processing*

The image processing workflow and the ImageJ macros used to generate the quantitative data are detailed in Supplementary Material 4. Briefly, image analysis consisted of pre-processing, segmentation and analysis/measurements and quantification of PBMCs and T cells in the stromal compartment. Pre-processing consisted on re-scaling all images in z-direction by the factor of 1.8 to obtain cubic voxels of 1.66  $\mu\text{m}$  edge length. Next, the red, green and blue channel were sharpened by 3D unsharp masking, which consisted of one blurring step using the *Gaussian Blur 3D...* function with  $\sigma_x = \sigma_y = \sigma_z = 5$  and subsequent subtraction of the blurred image from the input stack using the *Image Calculator*. Two additional 3D unsharp masking steps were performed on the red and green channel to further enhance the signal in respect to the background. The *Hybrid 3D Median filter* plugin was used to reduce noise in the red and green channel. Finally, closing was performed on the green channel by using the *Morphological Filters (3D)* function implemented in the *MorphoLibJ* plugin<sup>56</sup> with a ball of radius = 2, to fill circles resulting from surface staining of T cells.

Segmentation of the red and green channel was done using the *3D Watershed* as part of the *3D Segmentation* plugin<sup>57</sup>. Seeds were identified automatically from the input stack within a radius of 4. For red segmentation, fixed parameters were applied to all chips. The *seeds* threshold, defining the minimum value a local maxima needs to pass to be considered as a seed, was kept at 1000, and the *image* threshold for clustering voxels around seeds was set to 500. In green segmentation, these parameters were normalized against the maximum green intensity ( $\text{max}_{\text{green}}$ ) of each specific chip using a constant of 0.043574883 for the seeds threshold and a constant of 0.021787442 for the image threshold. The 3D Watershed segmentation results in labeled object images. Position and volume of all red objects were measured using the *3D Centroid* and *3D Geometrical Measure* function implemented in the *3D Segmentation* plugin<sup>57</sup>, respectively. Objects smaller than 30 voxels (corresponding to a volume of 137.22  $\mu\text{m}^3$ ) were eliminated in a size filtering step. The total number of PBMCs and PBMC counts in the bottom (0  $\mu\text{m}$  – 63  $\mu\text{m}$ ) and top (64  $\mu\text{m}$  – 126  $\mu\text{m}$ ) section of the melanocyte compartment were determined from the remaining objects. For T cell quantification, first labeled object images obtained from segmentation in the green channel were binarized in a way that all object voxels were assigned to 255 while background voxels were assigned to 0. Second, the proportional overlap of each red object with any green object voxel was measured using *3D Intensity Measure* (54). Finally, T cells were counted as those PBMCs that overlap at least with one green object voxel (meaning that the measured intensity is > 0) and were grouped into top and bottom, similar to PBMCs.

### **Statistical analysis**

Bar graphs are represented as average values  $\pm$  SEM. The number of independent experiments, biological replicates, is detailed in each figure caption. Statistically significant differences among two groups were analyzed using a One-way ANOVA for cell viability, cell fractions, CD69 expression and cytokine analysis and using mixed-effects model (Restricted Maximum Likelihood (REML)) for the migration analysis were PBMCs and CD3+ cells were considered dependent variables. This model was chosen instead of Two-way ANOVA due of the different number of biological experiments per condition and the results can be interpreted like repeated measures ANOVA<sup>58</sup>. Graphpad Prism software (version 8.2.0), with the threshold for significance set at  $P < 0.05$ . Those are referred in the text and exhaustively described in Supplementary Material 2.



## References

1. Marx, U. *et al.* Biology-inspired microphysiological systems to advance medicines for patient benefit and animal welfare. *ALTEX* **37**, 365–394 (2020).
2. Franzen, N. *et al.* Impact of organ-on-a-chip technology on pharmaceutical R&D costs. *Drug Discov. Today* **24**, 1720–1724 (2019).
3. Bourne, R. R. A. *et al.* Magnitude, temporal trends, and projections of the global prevalence of blindness and distance and near vision impairment: a systematic review and meta-analysis. *Lancet Glob. Heal.* **5**, e888–e897 (2017).
4. Renouf, D. J., Velazquez-Martin, J. P., Simpson, R., Siu, L. L. & Bedard, P. L. Ocular Toxicity of Targeted Therapies. *J. Clin. Oncol.* **30**, 3277–3286 (2012).
5. Liu, X. *et al.* Clinical diagnosis and treatment recommendations for ocular toxicities of targeted therapy and immune checkpoint inhibitor therapy. *Thorac. cancer* **11**, 810–818 (2020).
6. Haderspeck, J. C., Chuchuy, J., Kustermann, S., Liebau, S. & Loskill, P. Organ-on-a-chip technologies that can transform ophthalmic drug discovery and disease modeling. *Expert Opin. Drug Discov.* **14**, 47–57 (2019).
7. Nickla, D. L. & Wallman, J. THE MULTIFUNCTIONAL CHOROID. *Prog. Retin. Eye Res.* **29**, 144 (2010).
8. Mérida, S., Palacios, E., Navea, A. & Bosch-Morell, F. New Immunosuppressive Therapies in Uveitis Treatment. *Int. J. Mol. Sci.* **16**, 18778–18795 (2015).
9. Duplechain, A., Conrady, C. D., Patel, B. C. & Baker, S. Uveitis. (2019).
10. Geetha, R. & Tripathy, K. Chorioretinitis. (2019).
11. Hager, T. & Seitz, B. Ocular side effects of biological agents in oncology: what should the clinician be aware of? *Onco. Targets. Ther.* **7**, 69–77 (2013).
12. Chang, C.-J., Chen, S.-J., Hwang, D.-K. & Liu, C. J.-L. Bilateral anterior uveitis after immunotherapy for malignant melanoma. *Taiwan J. Ophthalmol.* **8**, 173–175 (2018).
13. Modjtahedi, B. S., Maibach, H. & Park, S. Multifocal bilateral choroidal neovascularization in a patient on ipilimumab for metastatic melanoma. *Cutan. Ocul. Toxicol.* **32**, 341–3 (2013).
14. Thomas, M., Armenti, S. T., Ayres, M. B. & Demirci, H. Uveal Effusion After Immune Checkpoint Inhibitor Therapy. *JAMA Ophthalmol.* **136**, 553 (2018).
15. Karkhur, S. *et al.* Interleukin-6 inhibition in the management of non-infectious uveitis and beyond. *J. Ophthalmic Inflamm. Infect.* **9**, 17 (2019).
16. Crowley, A. R. & Ackerman, M. E. Mind the Gap: How Interspecies Variability in IgG and Its Receptors May Complicate Comparisons of Human and Non-human Primate Effector Function. *Front. Immunol.* **10**, 697 (2019).
17. Cauvin, A. J., Peters, C. & Brennan, F. Advantages and Limitations of Commonly Used Nonhuman Primate Species in Research and Development of Biopharmaceuticals. in *The Nonhuman Primate in Nonclinical Drug Development and Safety Assessment* 379–395 (Elsevier, 2015). doi:10.1016/B978-0-12-417144-2.00019-6
18. Bjornson-Hooper, Z. B. *et al.* A comprehensive atlas of immunological differences between humans, mice and non-human primates. *bioRxiv* 574160 (2019). doi:10.1101/574160

19. Chen, P., Denniston, A. K., Hirani, S., Hannes, S. & Nussenblatt, R. B. Role of dendritic cell subsets in immunity and their contribution to noninfectious uveitis. *Surv. Ophthalmol.* **60**, 242–9 (2015).
20. London, N. J., Garg, S. J., Moorthy, R. S. & Cunningham, E. T. Drug-induced uveitis. *J. Ophthalmic Inflamm. Infect.* **3**, 43 (2013).
21. Ko, J., Lee, Y., Lee, S., Lee, S. & Jeon, N. L. Human Ocular Angiogenesis-Inspired Vascular Models on an Injection-Molded Microfluidic Chip. *Adv. Healthc. Mater.* **8**, 1900328 (2019).
22. Park, S. M. *et al.* Development of an in vitro 3D choroidal neovascularization model using chemically induced hypoxia through an ultra-thin, free-standing nanofiber membrane. *Mater. Sci. Eng. C* **104**, 109964 (2019).
23. Shin, J. U. *et al.* Recapitulating T cell infiltration in 3D psoriatic skin models for patient-specific drug testing. *Sci. Rep.* **10**, 4123 (2020).
24. Aung, A., Kumar, V., Theprungsirikul, J., Davey, S. K. & Varghese, S. An Engineered Tumor-on-a-Chip Device with Breast Cancer–Immune Cell Interactions for Assessing T-cell Recruitment. *Cancer Res.* **80**, 263–275 (2020).
25. Kim, H. *et al.* Macrophages-Triggered Sequential Remodeling of Endothelium-Interstitial Matrix to Form Pre-Metastatic Niche in Microfluidic Tumor Microenvironment. *Adv. Sci.* **6**, 1900195 (2019).
26. Ayuso, J. M. *et al.* Evaluating natural killer cell cytotoxicity against solid tumors using a microfluidic model. *Oncoimmunology* **8**, 1553477 (2019).
27. Nguyen, M. *et al.* Dissecting Effects of Anti-cancer Drugs and Cancer-Associated Fibroblasts by On-Chip Reconstitution of Immunocompetent Tumor Microenvironments. *Cell Rep.* **25**, 3884–3893.e3 (2018).
28. Yiu, G. *et al.* Effect of Uveal Melanocytes on Choroidal Morphology in Rhesus Macaques and Humans on Enhanced-Depth Imaging Optical Coherence Tomography. *Investig. Ophthalmology Vis. Sci.* **57**, 5764 (2016).
29. Qiu, C. *et al.* Differential expression of TYRP1 in adult human retinal pigment epithelium and uveal melanoma cells. *Oncol. Lett.* **11**, 2379–2383 (2016).
30. Pitkänen, L., Ranta, V.-P., Moilanen, H. & Urtti, A. Permeability of Retinal Pigment Epithelium: Effects of Permeant Molecular Weight and Lipophilicity. *Investig. Ophthalmology Vis. Sci.* **46**, 641 (2005).
31. del Amo, E. M. *et al.* Pharmacokinetic aspects of retinal drug delivery. *Prog. Retin. Eye Res.* **57**, 134–185 (2017).
32. Mochizuki, M., Sugita, S. & Kamoi, K. Immunological homeostasis of the eye. *Prog. Retin. Eye Res.* **33**, 10–27 (2013).
33. Rimpelä, A.-K. *et al.* Implications of melanin binding in ocular drug delivery. *Adv. Drug Deliv. Rev.* **126**, 23–43 (2018).
34. Hu, D.-N. *et al.* Interleukin-1 $\beta$  Increases Baseline Expression and Secretion of Interleukin-6 by Human Uveal Melanocytes In Vitro via the p38 MAPK/NF- $\kappa$ B Pathway. *Investig. Ophthalmology Vis. Sci.* **52**, 3767 (2011).
35. Sato, T., Takeuchi, M., Karasawa, Y., Enoki, T. & Ito, M. Intraocular inflammatory cytokines in patients with neovascular age-related macular degeneration before and after initiation of intravitreal injection of anti-VEGF inhibitor. *Sci. Rep.* **8**, 1098 (2018).

36. Perez, V. *et al.* Elevated Levels of Interleukin 6 in the Vitreous Fluid of Patients with Pars Planitis and Posterior Uveitis: The Massachusetts Eye & Ear Experience and Review of Previous Studies. *Ocul. Immunol. Inflamm.* **12**, 205–214 (2004).
37. Ziegler, E. *et al.* CCR7 signaling inhibits T cell proliferation. *J. Immunol.* **179**, 6485–93 (2007).
38. Cibrián, D. & Sánchez-Madrid, F. CD69: from activation marker to metabolic gatekeeper. *Eur. J. Immunol.* **47**, 946–953 (2017).
39. Weissenbach, M. *et al.* Interleukin-6 is a direct mediator of T cell migration. *Eur. J. Immunol.* **34**, 2895–906 (2004).
40. Mathews, D., Mathews, J. & Jones, N. P. Low-dose cyclosporine treatment for sight-threatening uveitis: efficacy, toxicity, and tolerance. *Indian J. Ophthalmol.* **58**, 55–8 (2010).
41. Flores, C., Fouquet, G., Moura, I. C., Maciel, T. T. & Hermine, O. Lessons to Learn From Low-Dose Cyclosporin-A: A New Approach for Unexpected Clinical Applications. *Front. Immunol.* **10**, 588 (2019).
42. Kerr, E. C., Copland, D. A., Dick, A. D. & Nicholson, L. B. The dynamics of leukocyte infiltration in experimental autoimmune uveoretinitis. *Prog. Retin. Eye Res.* **27**, 527–35 (2008).
43. Mesquida, M., Molins, B., Llorenç, V., de la Maza, M. S. & Adán, A. Targeting interleukin-6 in autoimmune uveitis. *Autoimmun. Rev.* **16**, 1079–1089 (2017).
44. Härtel, C. *et al.* Individual variability in cyclosporin A sensitivity: the assessment of functional measures on CD28-mediated costimulation of human whole blood T lymphocytes. *J. Interferon Cytokine Res.* **23**, 91–9 (2003).
45. Stein, C. M., Murray, J. J. & Wood, A. J. Inhibition of Stimulated Interleukin-2 Production in Whole Blood: A Practical Measure of Cyclosporine Effect. *Clin. Chem.* **45**, 1477–1484 (1999).
46. Ross, S. H. & Cantrell, D. A. Signaling and Function of Interleukin-2 in T Lymphocytes. *Annu. Rev. Immunol.* **36**, 411–433 (2018).
47. García, J. E. *et al.* Cyclosporin A decreases human macrophage interleukin-6 synthesis at post-transcriptional level. *Mediators Inflamm.* **8**, 253 (1999).
48. Jehs, T. *et al.* Induction of Chemokine Secretion and Monocyte Migration by Human Choroidal Melanocytes in Response to Proinflammatory Cytokines. *Investig. Ophthalmology Vis. Sci.* **57**, 6568 (2016).
49. Däbritz, J. *et al.* Reprogramming of Monocytes by GM-CSF Contributes to Regulatory Immune Functions during Intestinal Inflammation. *J. Immunol.* **194**, 2424–2438 (2015).
50. Datta, A. *et al.* Differential Effects of Immunosuppressive Drugs on T-Cell Motility. *Am. J. Transplant.* **6**, 2871–2883 (2006).
51. Ellerman, D. Bispecific T-cell engagers: Towards understanding variables influencing the in vitro potency and tumor selectivity and their modulation to enhance their efficacy and safety. *Methods* **154**, 102–117 (2019).
52. Rogal, J. *et al.* WAT-on-a-chip integrating human mature white adipocytes for mechanistic research and pharmaceutical applications. *Sci. Rep.* **10**, 6666 (2020).
53. Achberger, K. *et al.* Merging organoid and organ-on-a-chip technology to generate complex multi-layer tissue models in a human retina-on-a-chip platform. *Elife* **8**, (2019).
54. Graeve, T., Noll, M. & Schandar, M. Method for cultivating a cartilage replacement and a biomatrix produced according to this method. 7 (2001).

55. Kahan, B. D., Keown, P., Levy, G. A. & Johnston, A. Therapeutic drug monitoring of immunosuppressant drugs in clinical practice. *Clin. Ther.* **24**, 330–350 (2002).
56. Legland, D., Arganda-Carreras, I. & Andrey, P. MorphoLibJ: integrated library and plugins for mathematical morphology with ImageJ. *Bioinformatics* **32**, btw413 (2016).
57. Ollion, J., Cochenne, J., Loll, F., Escudé, C. & Boudier, T. TANGO: a generic tool for high-throughput 3D image analysis for studying nuclear organization. *Bioinformatics* **29**, 1840–1 (2013).
58. Corbeil, R. R. & Searle, S. R. Restricted Maximum Likelihood (REML) Estimation of Variance Components in the Mixed Model. *Technometrics* **18**, 31 (1976).

### **Acknowledgements**

Eva Forsten, Stefanie Fuchs, Dominic Baum, Cristhian Rojas, Sandra Sturm, for chip production. Saskia van de Poel for technical support. Lisa Zeifang, Laura Laistner and Julia Roos for stainings and image acquisition.

### **Author Contributions**

P.L., S.K., M.C., A.S. designed the study; P.L. and C.P. designed and developed the chip production protocols, K.S. performed the COMSOL modulations; M.C., K.L. and K.S. performed experiments; M.C. collected and analyzed data; M.J.F. performed the image analysis; L.M. contributed to the RPE differentiation; M.W. contributed to the collection of immune cells. S.L., K.A., M.M., V.N. and A.S. provided conceptual advice.

### **Competing Interests**

M.M, V.N, A.S., A.M.G and S.K are employees of Pharmaceutical Sciences, Roche Pharma Research and Early Development. M.C., C.P. and P.L hold a patent related to the technology presented in the manuscript (WO2020120466).

### **Data availability statement**

The data that support the findings of this study are available from the corresponding author upon reasonable request.

# Supplementary Material 1 – Supplementary Figures

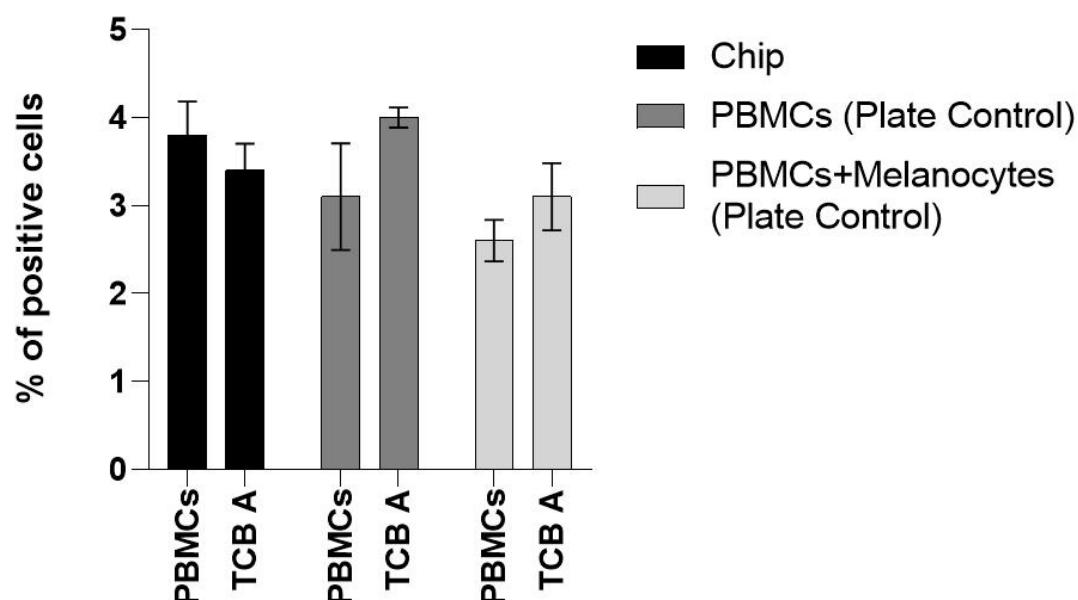

**Supplementary Figure 1. Evaluation of PBMCs proliferative status after perfusion on the choroid chip and on the plate controls with and without TCB A treatment.** Quantification of Ki-67 positive cells by flow cytometry analysis of the effluents in the chips (black bars) and on the plate controls with and without melanocytes (light and dark grey respectively) (n=2). Bars represent Averages  $\pm$  SEM.

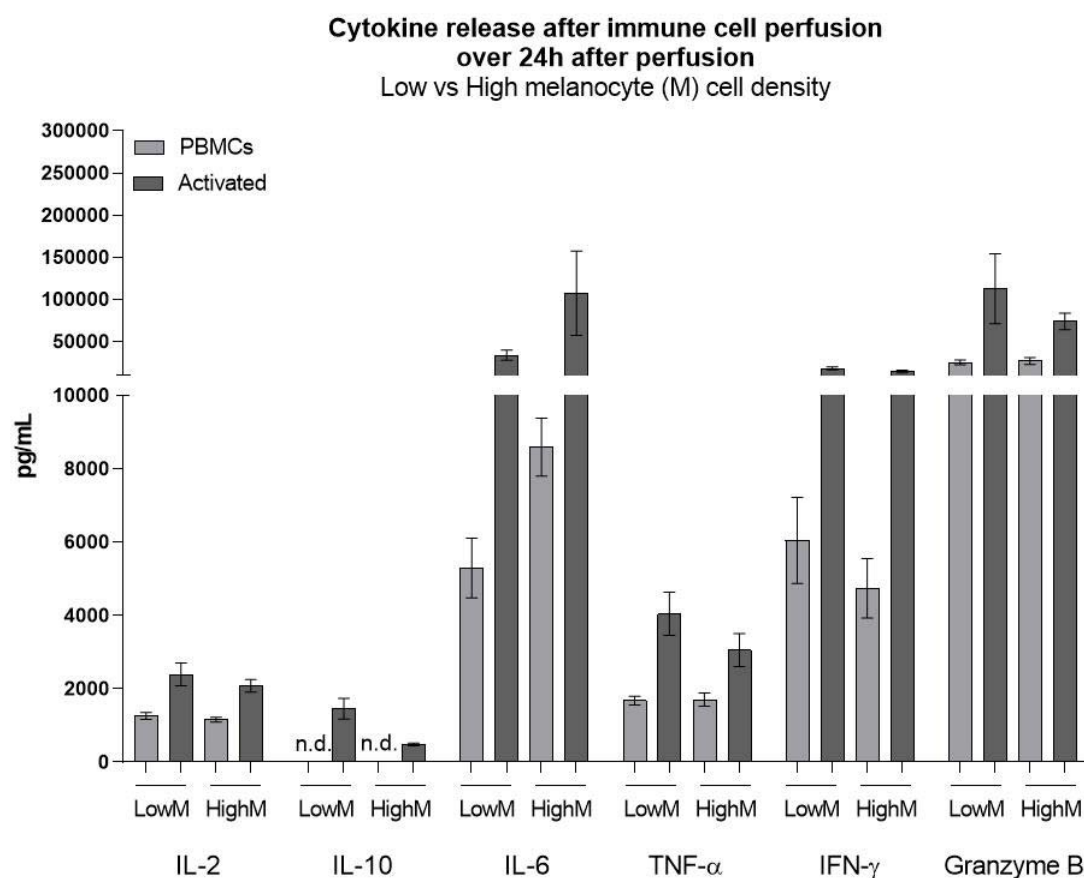

**Supplementary Figure 2. Validation of PBMC perfusion, viability, recruitment and cytokine release upon activation with anti CD3/CD28 antigens (Act) in low melanocyte cell density (LowM) and High melanocyte cell density (HighM).** Quantification of the cytokines IL-2, IL-10, IL-6, IFN- $\gamma$ , TNF- $\alpha$  and granzyme B on the effluents of chips after 24h of perfusion. Statistical analysis represents the comparison between chips perfused with PBMCs and chips perfused with activated cells (n=3-5). Bars represent Averages  $\pm$  SEM.



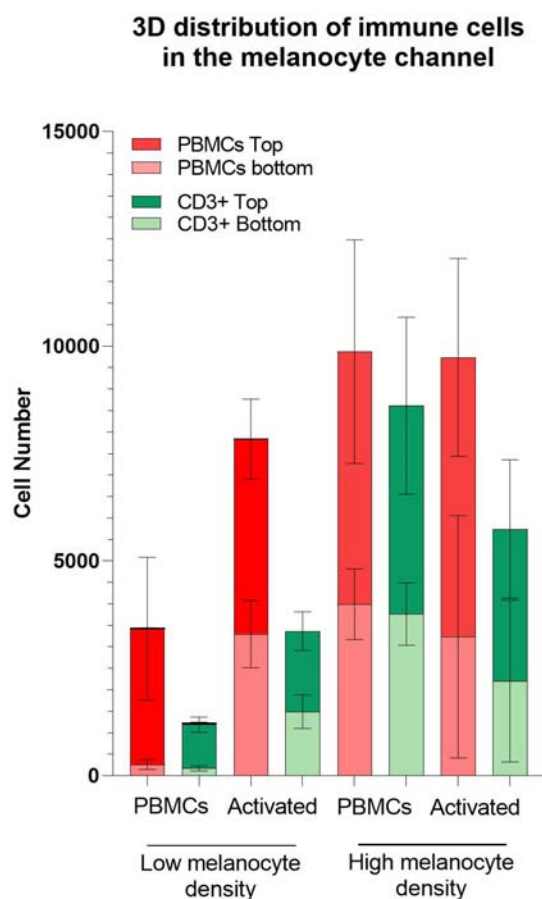

**Supplementary Figure 3. Validation of PBMC perfusion, viability, recruitment and cytokine release upon activation with anti CD3/CD28 antigens (Act) in low and high melanocyte cell density.** Quantification of immune cell recruitment by image analysis of the whole chip, distinguishing PBMCs (cell tracker labeled prior perfusion) and T cells (CD3 post fixation staining) in the top (dark red and green) and bottom (light red and green) halves of the melanocyte compartment chips. Statistical analysis represents the comparison of total immune cells between chips perfused with PBMCs and chips perfused with activated cells (n=2-12).

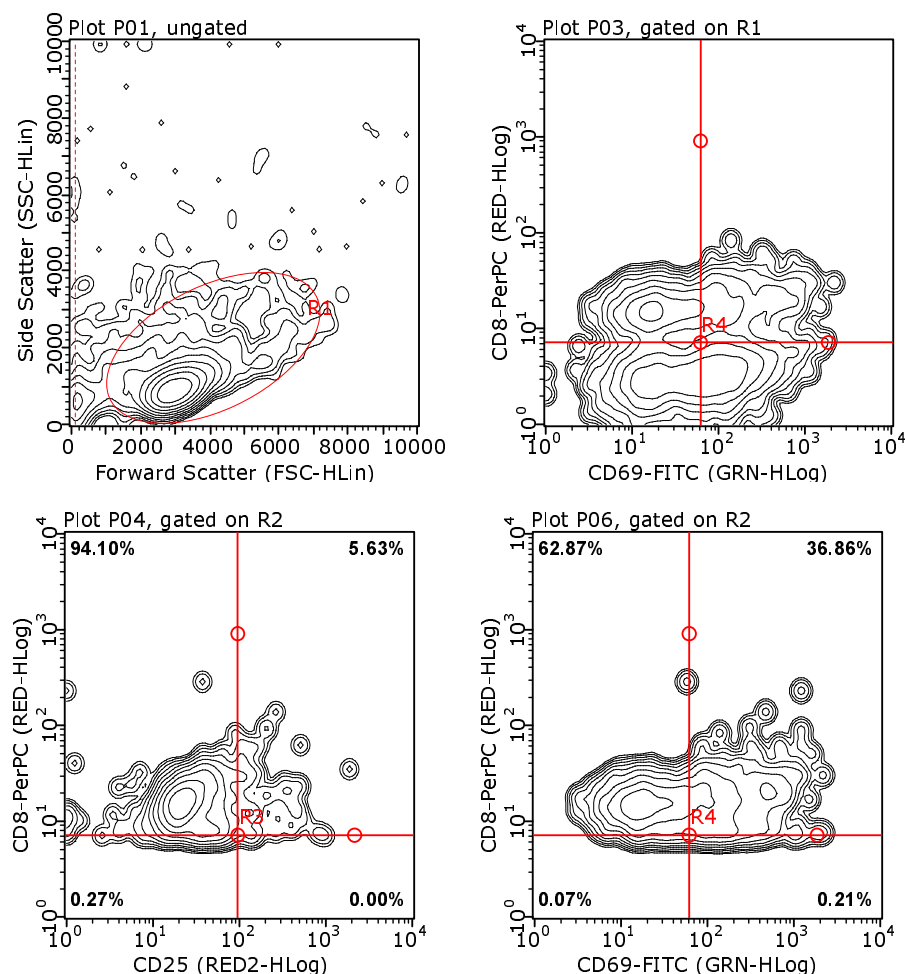

**Supplementary Figure 4. Counterplots of the gating strategy applied to Flow Cytometry data from Figures 4, 5 and S1.** For Figures 4 and 5 the PBMCs were gated on the FCS/SSC plot (R1) before gating for CD8a (R2). The quantification of the fraction of CD25 and CD69 positive cells was performed for the CD8a positive population. For Figure S1 the PBMCs were gated on the FCS/SSC plot before gating for Ki-67.

## Supplementary Material 2 – Detailed statistical analysis

Uploaded separately

## Supplementary Material 3

### Macro for image analysis for melanocyte size

```
run("8-bit");
setAutoThreshold("Default dark");
run("Convert to Mask");
run("Set Scale...", "distance=374.699 known=250 pixel=1 unit=µm global");
run("Analyze Particles...", "size=100-Infinity circularity=0.30-1.00 display exclude clear include in_situ");
```

Calculation (performed in excel):

Average cell area obtained from macro

Average cell radius =  $(1/\pi) * \text{Average Cell Area}^{0.5} / 1000$

Average cell volume =  $4/3 * \pi * \text{Average cell radius}^3$

Cell volume corrected to cell volumetric expansion = Average cell volume \* Cell expansion ratio of 3.68, calculated from cell area in 2D monolayer

Cell number for high melanocyte density =  $5 \mu\text{L (volume used for seeding)} / 100 * 50.97$  (Percentage of volume occupied by melanocytes in Rhesus eye / Cell volume corrected to cell volumetric expansion)

Cell number for low melanocyte density =  $5 \mu\text{L (volume used for seeding)} / 100 * 5.69$  (Percentage of volume occupied by melanocytes in white human eye / Cell volume corrected to cell volumetric expansion)

## Supplementary Material 4

### Macro for image analysis for immune cell recruitment

```
// Macro for Choroid-on-a-chip preprocessing, segmentation and analysis

// ***EXPLANATIONS***

// Macro to process chips of one directory (input directory) of following structure
// directory (dir) --> subdir chip 1 --> chip1.zen
//          --> subdir chip 2 --> chip2.zen
// To use this macro you need to have the files in separate folders/subdirectories, which are inside
the input directory (dir)
// that you choose at the beginning.
// In each subdirectory there should be ONLY the file to be processed, because the macro takes the
first file in this subdirectory
// and opens it in Fiji. (file=filelist[0];) If there are more than one file in the subdirectroy,
// make sure that the image you want to process is the first one!
// All results and intermediate steps are saved in the specific subdirectories

//If the macro crashes or stops, and you want to start in the middle of the macro you need to define
the following variables
// (dir, subdir_new2 and file). Here an example is given.
//dir="C:\\Users\\fismon\\Desktop\\Human2\\";
//subdir_new2="2# CW28\\";
//file="#2 CW28.lsm";
//print(dir+subdir_new2+file);

//Start: Choose a directory as stated above using the pop-up window when running the macro
```

```

dir=getDirectory("Y:\000_Shared\LSM\Kirstin_Marvin\Data Final Datasheets and Raw from CW28-
39\11_Activated T cells 24+48h\Human");

print(dir);

list=getFileList(dir);

for (i=0; i<list.length; i++) {
    print(list[i]);

    subdir=list[i];
    subdir_length=lengthOf(subdir);
    last=subdir_length-1;
    subdir_new=substring(subdir, 0, last);
    subdir_new2=subdir_new+"\\";

    fileList=getFileList(dir+subdir_new2);
    file=fileList[0];
    print(dir+subdir_new2+file);
    open(dir+subdir_new2+file);

    selectWindow(file);

    // 0) 12 to 16 bit conversion
    a=65535/4095;
    run("Multiply...", "value="+a+" stack");

    // 1) Rescale z (saves the rescaled tiff file in the specific subdirectory, with a specific filename.
    //Example: If the original image is called #1_CW28, the rescaled image is saved as #1_CW28
    rescaled_conv.tif")

```

```

run("Scale...", "x=1.0 y=1.0 z=1.8 width=512 height=795 depth=77 interpolation=Bilinear average
create");

saveAs("Tiff", dir+subdir_new2+file+" rescaled_conv.tif");

// 2) Remove BF and merge red, green and blue channel in the correct order.
// The resulting hyperstack is renamed to ">filename< rescaled_rgb_conv.tif"
run("Split Channels");

run("Merge Channels...", "c1=[C1-"+file+" rescaled_conv.tif] c2=[C2-"+file+" rescaled_conv.tif]
c3=[C3-"+file+" rescaled_conv.tif] create keep");

rename(file+" rescaled_rgb_conv.tif");

//run("Channels Tool...");

Stack.setDisplayMode("color");

// 3) 3D unsharp mask (red, green, blue).
// Creates 3D gaussian blurred image and subtracts blurred image from ">filename<
rescaled_rgb_conv.tif".
// Saves resulting image as ">filename< rescaled_unsharped_conv.tif"
selectWindow(file+" rescaled_rgb_conv.tif");

run("Duplicate...", "duplicate");

run("Gaussian Blur 3D...", "x=5 y=5 z=5");

imageCalculator("Subtract create stack", file+" rescaled_rgb_conv.tif",file+" rescaled_rgb_conv-
1.tif");

selectWindow("Result of "+file+" rescaled_rgb_conv.tif");

saveAs("Tiff", dir+subdir_new2+"Result of "+file+" rescaled_unsharped_conv.tif");

//Close images that are not used anymore to save some memory
selectWindow(file+" rescaled_rgb_conv-1.tif");

close();

selectWindow(file+" rescaled_rgb_conv.tif");

close();

selectWindow("C3-"+file+" rescaled_conv.tif");

close();

selectWindow("C2-"+file+" rescaled_conv.tif");

```



```

close();

selectWindow("C1-"+file+" rescaled_conv.tif");

close();

selectWindow("C4-"+file+" rescaled_conv.tif");

close();


// Green 1) Split channels and close blue channel

selectWindow("Result of "+file+" rescaled_unsharped_conv.tif");

run("Split Channels");

close();


// Green 2) 2nd unsharp mask

selectWindow("C2-Result of "+file+" rescaled_unsharped_conv.tif");

run("Duplicate...", "title=blurred_2_green duplicate");

run("Gaussian Blur 3D...", "x=5 y=5 z=5");

imageCalculator("Subtract create stack", "C2-Result of "+file+"
rescaled_unsharped_conv.tif","blurred_2_green");

selectWindow("Result of C2-Result of "+file+" rescaled_unsharped_conv.tif");

rename(file+"_2unsharp_green");


// Green 3) 3rd unsharp mask

run("Duplicate...", "title=blurred_3_green duplicate");

run("Gaussian Blur 3D...", "x=5 y=5 z=5");

imageCalculator("Subtract create stack", file+"_2unsharp_green","blurred_3_green");

selectWindow("Result of "+file+"_2unsharp_green");

rename(file+"_3unsharp_green");


// Green 4) 3D Hybrid Median filter

selectWindow(file+"_3unsharp_green");

run("Hybrid 3D Median Filter", "include");

```

```
// Green 5) Closing (because green is surfaced stained). Ball radius =2. Save final preprocessed green
channel as "closed_green"
```

```
selectWindow("3d Hybrid Median Filter - "+file+"_3unsharp_green");
```

```
run("Morphological Filters (3D)", "operation=Closing element=Ball x-radius=2 y-radius=2 z-
radius=2");
```

```
//rename(file+"_closed_green");
```

```
rename("closed_green");
```

```
// Green Segmentation. Segmentation of the green channel is done by 3D Watershed using
normalized thresholds.
```

```
// Percentages to define these thresholds based on the maximum intensity value measured in the
green channel
```

```
// were found empirically. Based on several chips, the percentage was determined in such a way
that the objects
```

```
// resulting from segmentation matched in size and position with the cells seen in the preprocessed
images.
```

```
perc_seeds_green=0.043574883;
```

```
perc_image_green=0.021787442;
```

```
Stack.getStatistics(voxelCount, mean, min, max, stdDev);
```

```
max_green=max;
```

```
seeds= perc_seeds_green*max_green;
```

```
image= perc_image_green*max_green;
```

```
run("3D Watershed", "seeds_threshold="+seeds+" image_threshold="+image+" image=closed_green
seeds=Automatic radius=5");
```

```
rename(file+"_watershed_green");
```

```
// Red 2) 2nd unsharp mask
```

```
selectWindow("C1-Result of "+file+" rescaled_unsharped_conv.tif");
```

```
run("Duplicate...", "title=blurred_2_red duplicate");
```

```
run("Gaussian Blur 3D...", "x=5 y=5 z=5");
```

```

imageCalculator("Subtract create stack", "C1-Result of "+file+"
rescaled_unsharped_conv.tif", "blurred_2_red");

selectWindow("Result of C1-Result of "+file+" rescaled_unsharped_conv.tif");

rename(file+"_2unsharp_red");

// Red 3) 3rd unsharp mask

run("Duplicate...", "title=blurred_3_red duplicate");

run("Gaussian Blur 3D...", "x=5 y=5 z=5");

imageCalculator("Subtract create stack", file+"_2unsharp_red", "blurred_3_red");

selectWindow("Result of "+file+"_2unsharp_red");

rename(file+"_3unsharp_red");

// Red 4) 3D Hybrid Median filter

selectWindow(file+"_3unsharp_red");

run("Hybrid 3D Median Filter", "include");

selectWindow("3d Hybrid Median Filter - "+file+"_3unsharp_red");

rename("final_red");

// Red Segmentation. For red segmentation we used fixed thresholds: seeds=1000 image=500.

run("3D Watershed", "seeds_threshold=1000 image_threshold=500 image=final_red
seeds=Automatic radius=4");

rename("watershed_red");

//Analysis

// make binary mask of green watershed object file, so that all object voxels (=255) and
background/non-object voxels (=0).

selectWindow(file+"_watershed_green");

run("Duplicate...", "title=watershed_green_binary duplicate");

selectWindow("watershed_green_binary");

setAutoThreshold("Default dark");

```

```
//run("Threshold...");

setThreshold(1, 65535);

run("Convert to Mask", "method=Default background=Dark black");


// Tcell selection by intensity measurement/ COLOCALIZATION

// To select Tcells later (Excel analysis) we measure the intensity of all red objects in the binarized
green image.

// Results are saved as "Results_red_green_overlap.csv"

run("3D Intensity Measure", "objects=watershed_red signal=watershed_green_binary");

saveAs("Results", dir+subdir_new2+"Results_red_green_overlap.csv");

close("Results");


//Positon and volume measurement

// Position and volume of all red objects are measured. In this way we can later distinguish between
real cells (>30 voxels)

// and background objects. And we can count cells by their location

selectWindow("watershed_red");

run("3D Centroid");

saveAs("Results", dir+subdir_new2+"Results_postion_red.csv");

close("Results");


selectWindow("watershed_red");

run("3D Geometrical Measure");

saveAs("Results", dir+subdir_new2+"Results_volume_red.csv");

close("Results");


// Save final images and intermediate steps

//make composite of red and green final preprocessed images

run("Merge Channels...", "c1=[final_red] c2=closed_green create keep");

//run("Channels Tool...");
```

```

Stack.setDisplayMode("color");

selectWindow("Composite");

saveAs("Tiff", dir+subdir_new2+file+"_red_green_final_processed.tif");


selectWindow(file+"_watershed_green");

saveAs("Tiff", dir+subdir_new2+file+"_watershed_green.tif");

selectWindow("watershed_green_binary");

saveAs("Tiff", dir+subdir_new2+"watershed_green_binary_"+file+".tif");

selectWindow("watershed_red");

saveAs("Tiff", dir+subdir_new2+"watershed_red_"+file+".tif");


close("");


}

```
